# Supplementary material for: A Bayesian approach to understanding the key factors influencing temporal variability in stream water quality – a case study in the Great Barrier Reef catchments
Source: Copernicus journal article supplement (doi:10.5194/hess-25-2663-2021), 2021-05-20
Supplement: Supplementary file 1 [file hess-25-2663-2021-supplement.pdf]

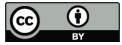

*Supplement of*

**A Bayesian approach to understanding the key factors influencing temporal variability in stream water quality – a case study in the Great Barrier Reef catchments**

**Shuci Liu et al.**

*Correspondence to:* Shuci Liu ([shucil@student.unimelb.edu.au](mailto:shucil@student.unimelb.edu.au))

The copyright of individual parts of the supplement might differ from the article licence.

5

10

### Hierarchical prior specification and Bayesian inference of key drivers

Bayesian inference required specification of prior distributions for each model parameter. A minimally-informative uniform prior (denote as  $U(\cdot)$ ) between 0 and 10 was assigned to the global standard deviation ( $\sigma$ , Eq. A1) (Gelman, 2006). The prior of  $I_n$  assumes that each indicator comes from an independent Bernoulli distribution, with a probability of 0.5 (Eq. A2) (Raftery et al., 1997). This vague prior results in each model structure having an equal prior model probability.

$$\sigma \sim U(0,10) \quad \text{A1}$$

$$I_n \sim \text{Bernoulli}(0.5) \quad \text{A2}$$

We used a hierarchical conditional prior specification for predictor coefficients, allowing the site-specific parameter values that describe the effects of each temporal predictors ( $\beta_{1,j}, \beta_{2,j}, \dots, \beta_{n,j}$ ) to be exchangeable between sites (Liu et al., 2008; O'Hara and Sillanpää, 2009; Webb and King, 2009). The prior of  $\beta_{n,j}$  was conditioned on  $I_n$ , resulting in a mixture distribution with 'slab and spike' prior, which was defined as follows,

$$\beta_{n,j} | I_n \sim I_n N(0, \tau_n) + (1 - I_n) N(0, \tau_{n,tune}) \quad \text{A3}$$

where  $\beta_{n,j} | (I_n = 1)$  is the slab part of the mixture distribution. The  $\beta_{n,j} | (I_n = 1)$  was estimated by including a higher-level distribution. The prior of  $\beta_{n,j} | (I_n = 1)$  followed a normal distribution with random effect (Eq. A4), with the  $\tau_n$  drawn from a common prior distribution, defined as a hyperparameter (i.e., uniform distribution between 0 to 20, Eq. A5) (Gelman, 2006; Kruschke, 2014).

$$\beta_{n,j} | (I_n = 1) \sim N(0, \tau_n) \quad \text{A4}$$

$$\tau_n \sim U(0, 20) \quad \text{A5}$$

- 25 For the spike component, a data-dependent prior was specified for  $\beta_{n,j} | (I_n = 0)$ , drawing from a *pseudo-prior* (Eq. A6), that is, a *priori* distribution with no effect on the posterior distribution, but facilitating the mixing of the Gibbs sampler.

$$\beta_{n,j} | (I_n = 0) \sim N(0, \tau_{n,tune}) \quad \text{A6}$$

We estimated  $\tau_{n,tune}$  from the standard deviations of the posterior of the  $\beta_{n,j}$  in a global model structure (i.e., modelling structure using all predictors), as suggested by Carlin and Chib (1995) and Linden and Roloff (2015). The prior of  $\beta_{n,j} | (I_n = 0)$  was near the posterior estimates to facilitate mixing in the MCMC (Hooten and Hobbs, 2015).

- 30 The posterior inclusion probability (PIP -  $P(I_n = 1 | \mathbf{y})$ , Eq. A7) of each predictor was used to compare the relative importance of individual predictors (i.e., how often the  $n^{\text{th}}$  predictor was ‘in’ the model).

$$P(I_n = 1 | \mathbf{y}) = \frac{1}{T} \sum_{t=1}^T I(I_n^{(t)} = 1) \quad \text{A7}$$

where  $T$  is the total number of iterations of Markov chains. The different combination of  $I_n$  at each MCMC sampling represents a specific model structure. According to Bayes’ theorem, the posterior model probability (PMP -  $P(M_k | \mathbf{y})$ ) can be estimated as,

$$P(M_k | \mathbf{y}) = \frac{[\mathbf{y} | M_k] P(M_k)}{\sum_{x=1}^L [\mathbf{y} | M_x] P(M_x)} \quad \text{A8}$$

- where  $L$  is the total number of possible models, and  $P(M_k)$  is the prior probability of model  $M_k$ , among a group of models  $M_x$ ,  $x = 1, \dots, X$ . This posterior model probability can be obtained by assessing the frequency of a particular combination of  $I_n$  during the MCMC sampling.

## Reference

- Carlin, B. P. and Chib, S.: Bayesian model choice via Markov chain Monte Carlo methods, *Journal of the Royal Statistical Society: Series B (Methodological)*, 57, 473-484, 1995.
- 40 Gelman, A.: Prior distributions for variance parameters in hierarchical models (comment on article by Browne and Draper), *Bayesian analysis*, 1, 515-534, 2006.
- Hooten, M. B. and Hobbs, N. T.: A guide to Bayesian model selection for ecologists, *Ecological Monographs*, 85, 3-28, 2015.
- Kruschke, J.: *Doing Bayesian data analysis: A tutorial with R, JAGS, and Stan*, Academic Press, 2014.
- Linden, D. W. and Roloff, G. J.: Improving inferences from short-term ecological studies with Bayesian hierarchical modeling: white-headed woodpeckers in managed forests, *Ecology and evolution*, 5, 3378-3388, 2015.
- 45 Liu, Y., Guo, H., Mao, G., and Yang, P.: A bayesian hierarchical model for urban air quality prediction under uncertainty, *Atmospheric Environment*, 42, 8464-8469, 2008.
- O’Hara, R. B. and Sillanpää, M. J.: A review of Bayesian variable selection methods: what, how and which, *Bayesian analysis*, 4, 85-117, 2009.
- 50 Raftery, A. E., Madigan, D., and Hoeting, J. A.: Bayesian model averaging for linear regression models, *Journal of the American Statistical Association*, 92, 179-191, 1997.
- Webb, A. and King, E. L.: A Bayesian hierarchical trend analysis finds strong evidence for large-scale temporal declines in stream ecological condition around Melbourne, Australia, *Ecography*, 32, 215-225, 2009.

Figure

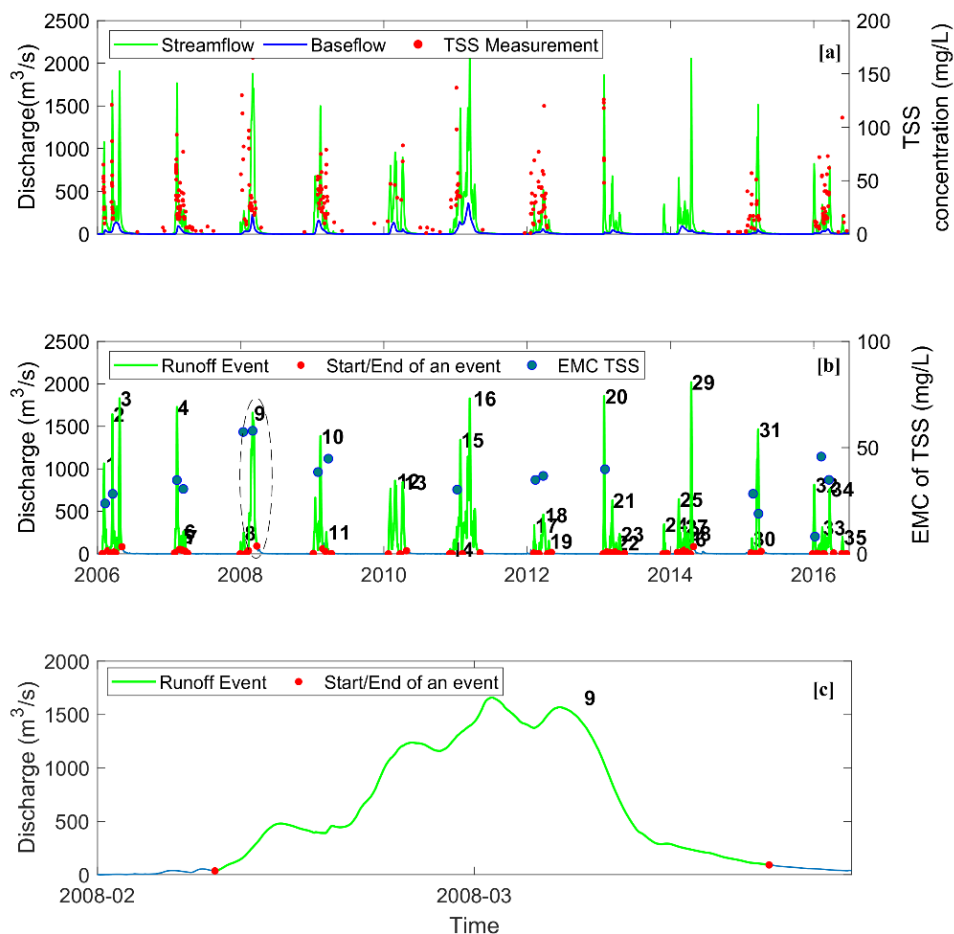

60

Figure S1: Delineation of runoff events and estimation of EMCs, based on the hydrograph for 105107A Normanby River at Kalpowar Crossing in the GBR catchments: [a] baseflow separation from continuous streamflow observations; [b] event identification and development of EMC, and 35 runoff events are identified with red dots representing either the start or end of a runoff event; and [c] A zoom in event #9 in 2008.

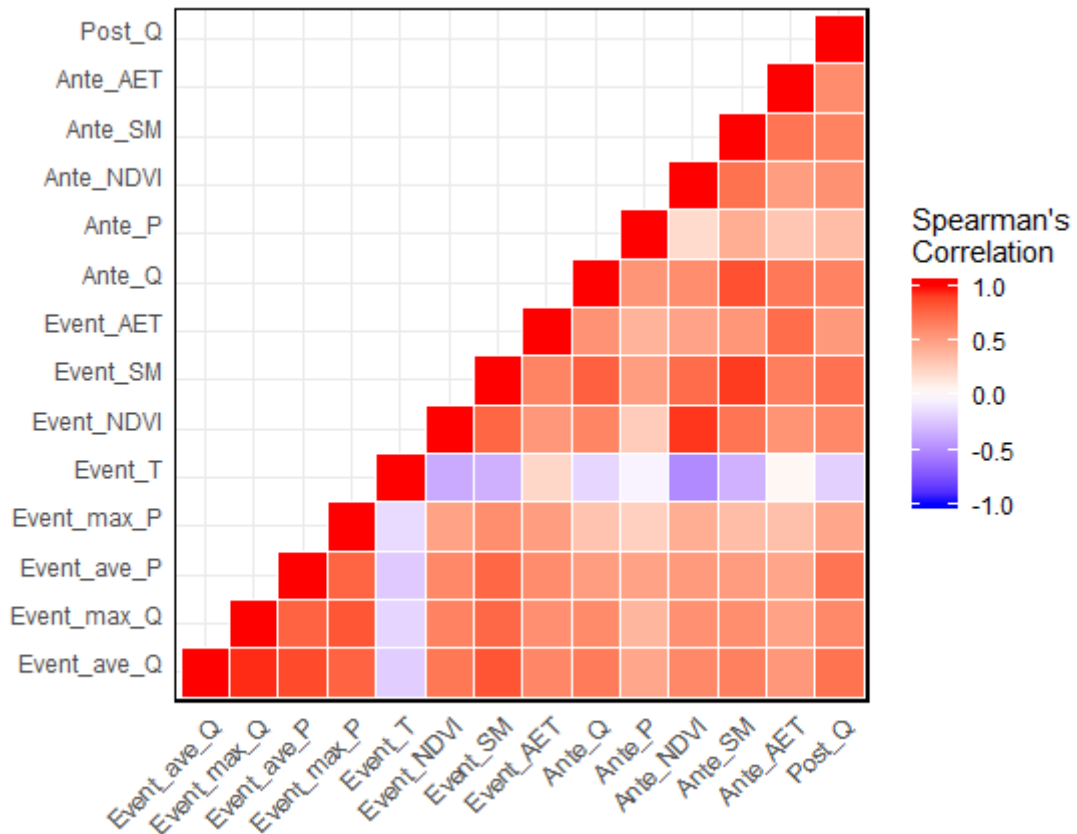

65

Figure S2: Spearman's Rank correlation between 14 candidate predictors.

70

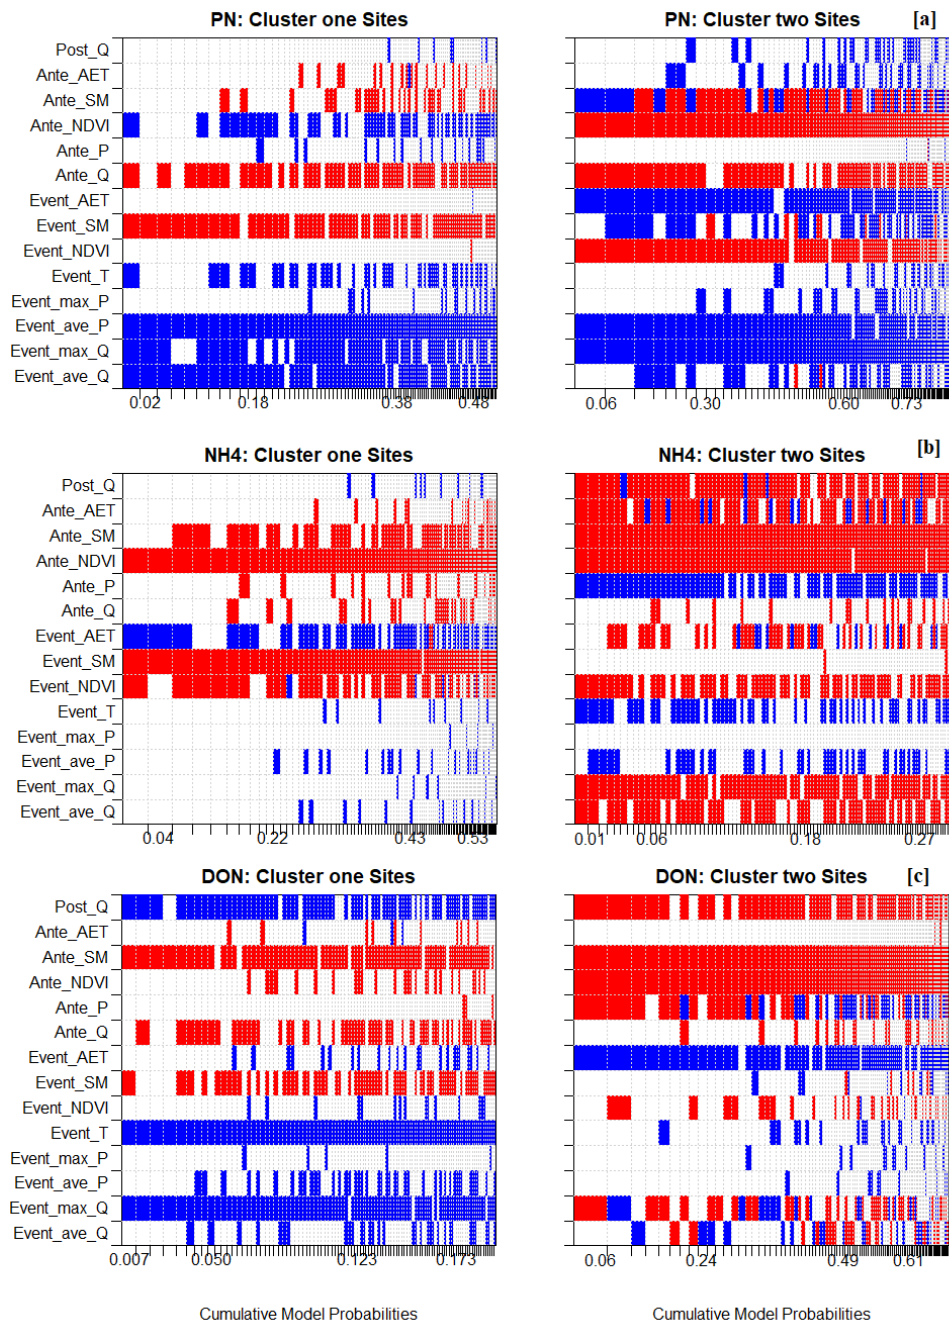

75

**Figure S3: Comparison of BMA model coefficient and cumulative model probability (top 100 models) between two clusters for: (a) PN, (b) NH<sub>4</sub> and (c) DON. Left - cluster one sites and Right – cluster two sites. Each column in the heatmap represents the one specific model (ranked from highest model probability) and the width of the column is normalised by the posterior model probability. The colour indicates the direction of the coefficients, red – negative and blue – positive. Note: the coefficient value was averaged across the posterior median value of site-specific coefficient within each cluster (effect size,  $\theta_{nj}$ , in Eq. (6)).**

80

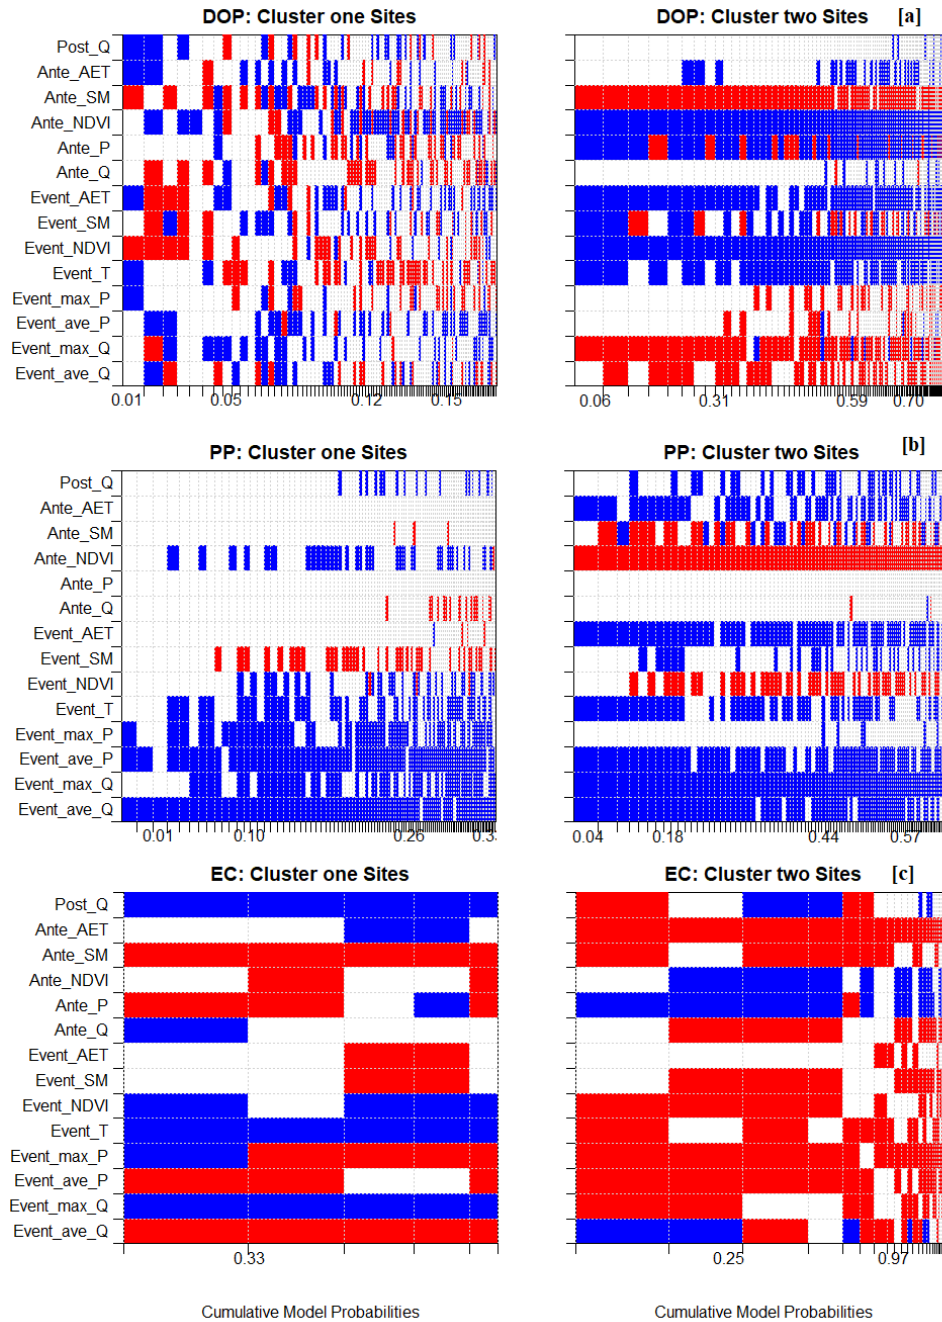

85 **Figure S4: Comparison of BMA model coefficient and cumulative model probability (top 100 models) between two clusters for: (a) DOP, (b) PP and (c) EC. Left - cluster one sites and Right – cluster two sites. The order of predictors on the y-axis was ranked based on the posterior inclusion probability. Each column in the heatmap represents the one specific model (ranked from highest model probability) and the width of the column is normalised by the posterior model probability. The colour indicates the direction of the coefficients, red – negative and blue – positive. Note: the coefficient value was averaged across the posterior median value of site-specific coefficient within each cluster (effect size,  $\theta_{n,j}$ , in Eq. (6)).**

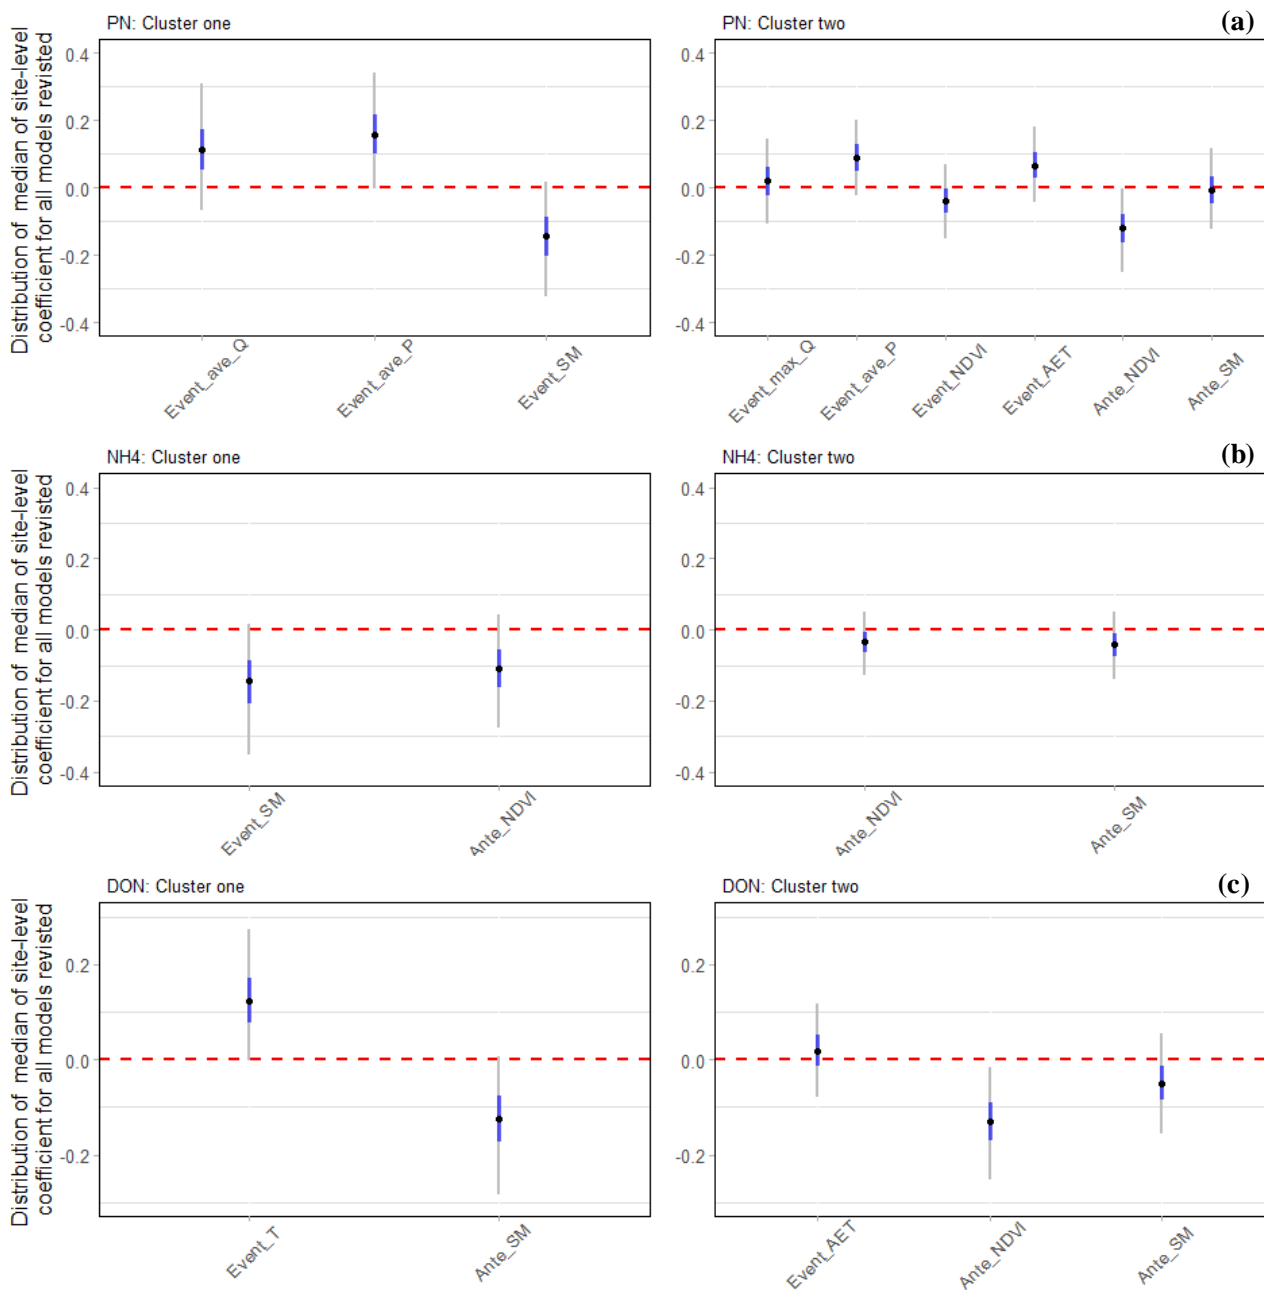

90 **Figure S5: Distribution of median of site-level coefficients for all plausible models in BMA. (a) PN, (b) NH<sub>4</sub> and (c) DON. Only predictors with PIP > 0.8 are included. For each specific model structure, the coefficient value of a predictor was the median of site-specific coefficient across all sites (effect size,  $\theta_{n,j}$ , in Eq. (6)). The distribution of this value thus represents the probability of the model (PMP), as well as variability in the same predictor across different sites. Note: black dots indicate the median; grey vertical**



95 lines indicate 95% CI and blue coloured vertical lines indicates 50% CI. The definition of abbreviation of each predictor can be found in Table 3.

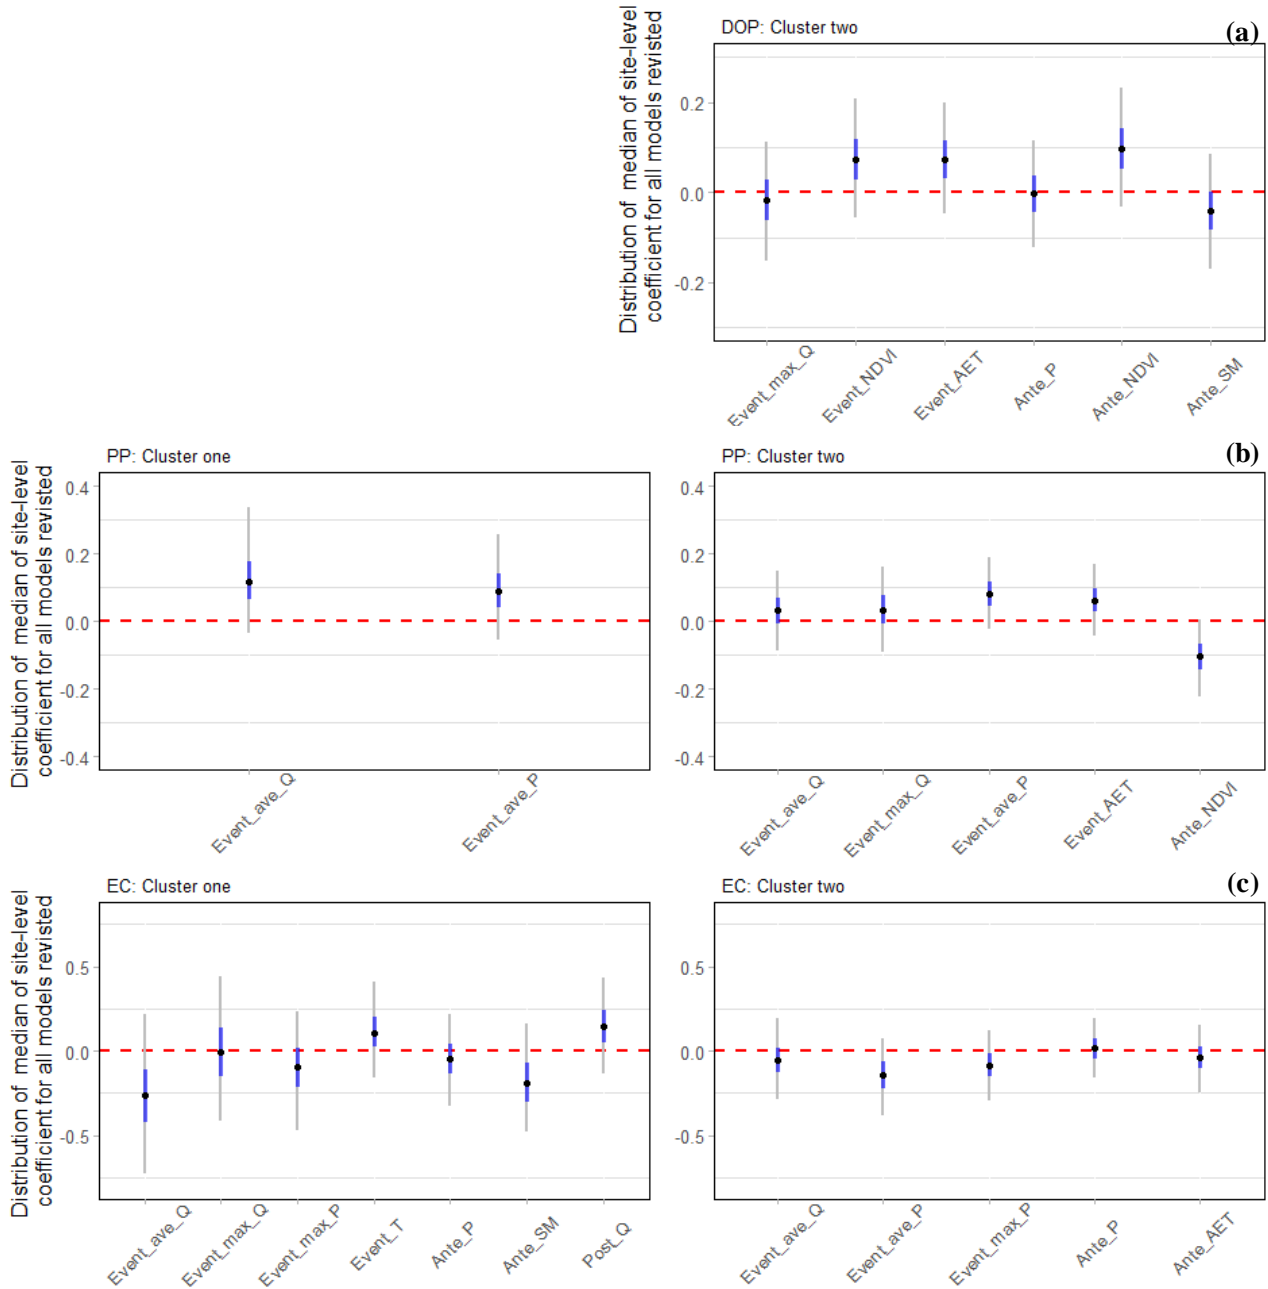

Figure S6: Distribution of median of site-level coefficients for all plausible models in BMA. (a) DOP, (b) PP and (c) EC. Only predictors with PIP > 0.8 are included. For each specific model structure, the coefficient value of a predictor was the median of site-

100 specific coefficient across all sites (effect size,  $\theta_{n,j}$  in Equation 6). The distribution of this value thus represents the probability of the model (PMP), as well as variability in the same predictor across different sites. Note: black dots indicate the median; grey vertical lines indicate 95% CI and blue coloured vertical lines indicates 50% CI. The definition of abbreviation of each predictor can be found in Table 3.

105

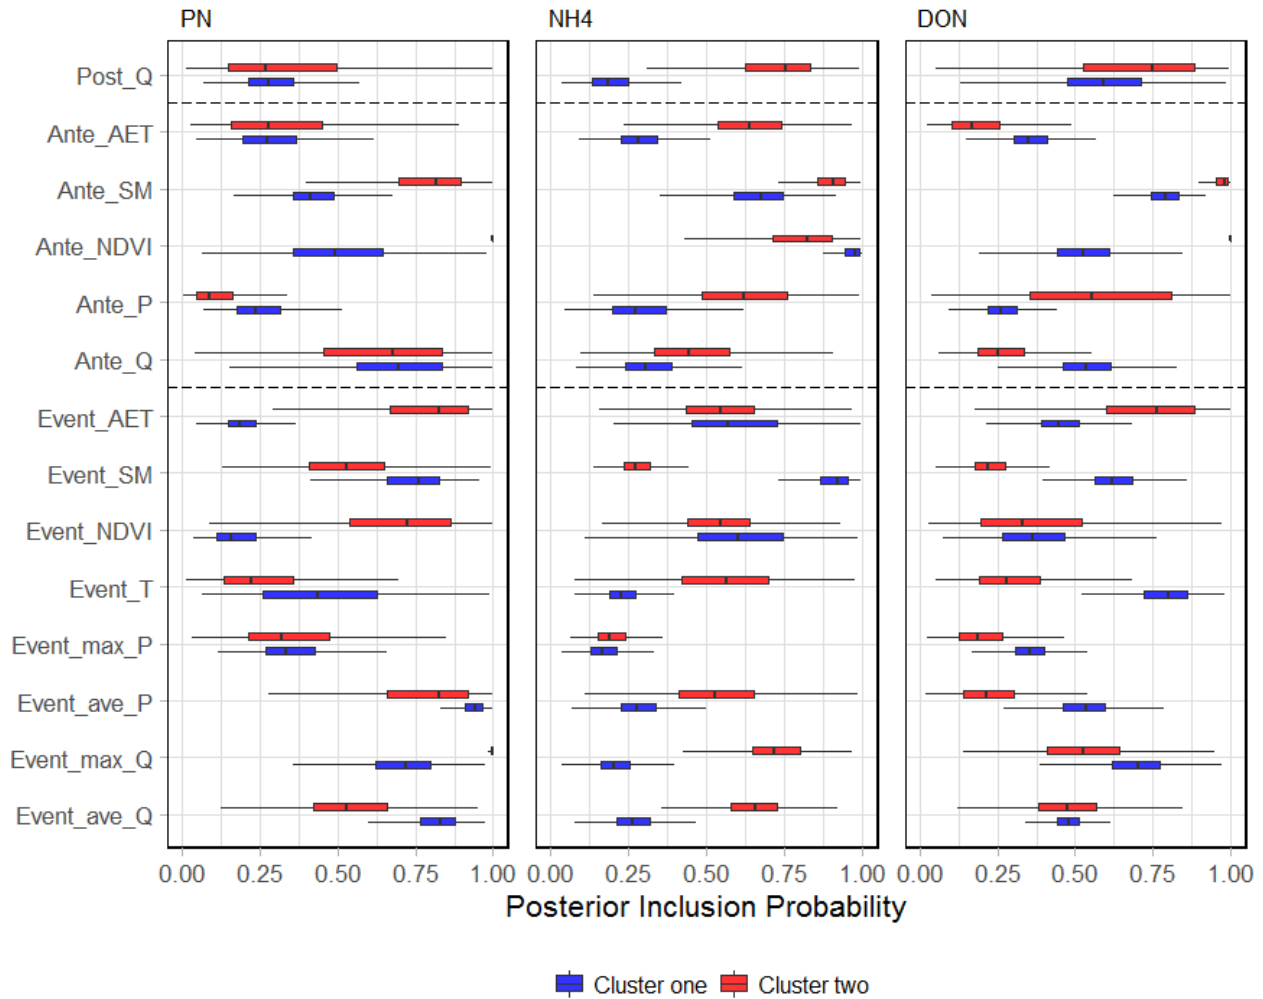

110 **Figure S7: The comparisons of distribution of posterior inclusion probability of individual predictors derived from 1,000 subsampled BMA runs. The interpretation of boxplot is the same as Fig. 7. Note: colour represents different clusters: blue - Cluster and red - Cluster two. The definition of abbreviation of each predictor can be found in Table 3.**

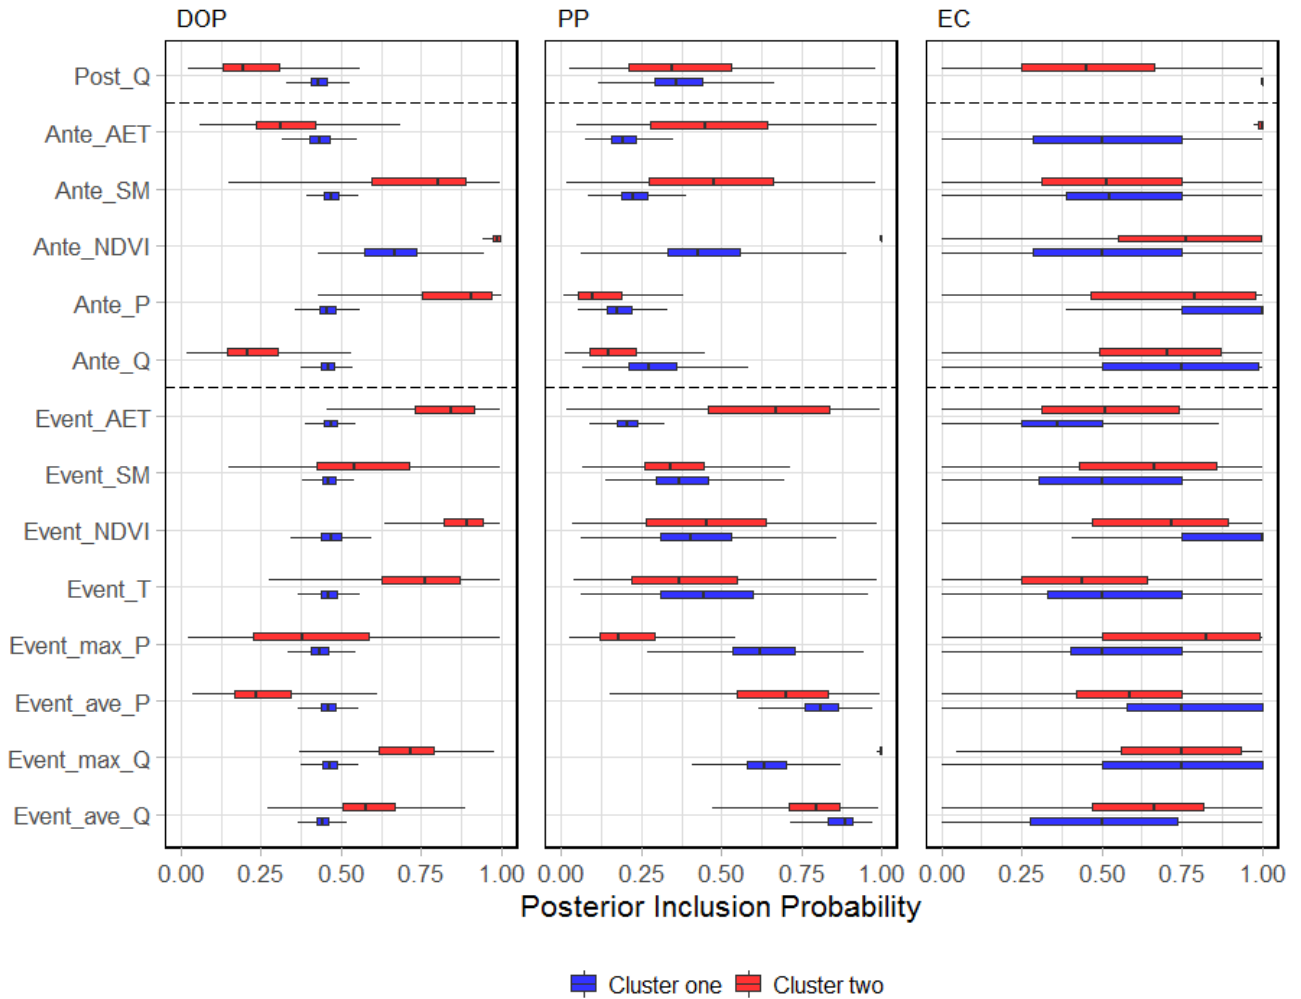

**Figure S8: The comparisons of distribution of posterior inclusion probability of individual predictors derived from 1,000 subsampling BMA. The interpretation of boxplot is the same as Fig. 7. Note: colour represents different clusters: blue - Cluster and red - Cluster two.**

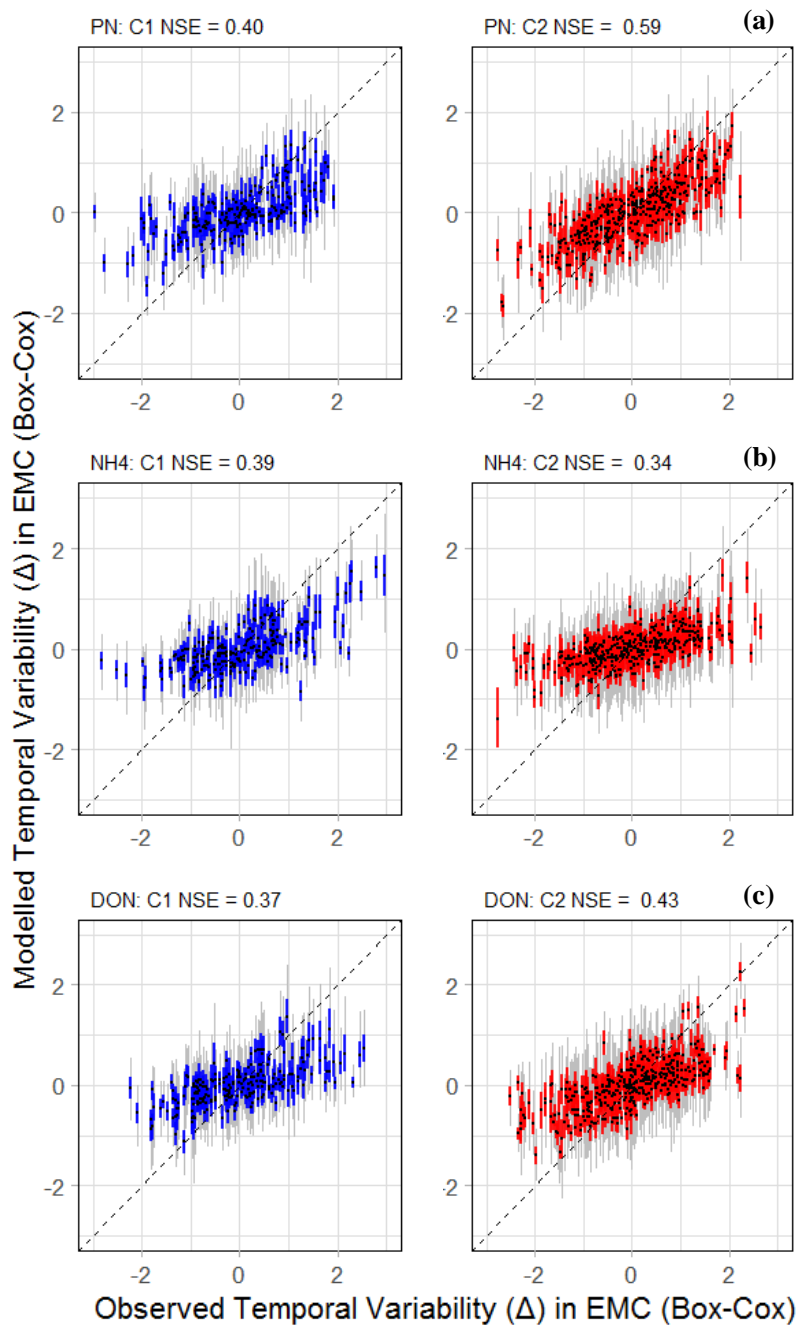

**Figure S9:** Performance of the BMA models of the temporal variability of nine constituents across 32 sites, represented by prediction intervals from BMA and observed Box-Cox EMC across two clusters of sites for: (a) PN; (b) NH<sub>4</sub> and (c) DON. The NSE values are calculated based on predictions within group- (cluster) level. *Note:* black dots are the prediction median; grey vertical lines are the 95% CI and coloured vertical lines indicates 50% CI: blue - Cluster and red - Cluster two. The dashed black lines is the 1:1 relationship.

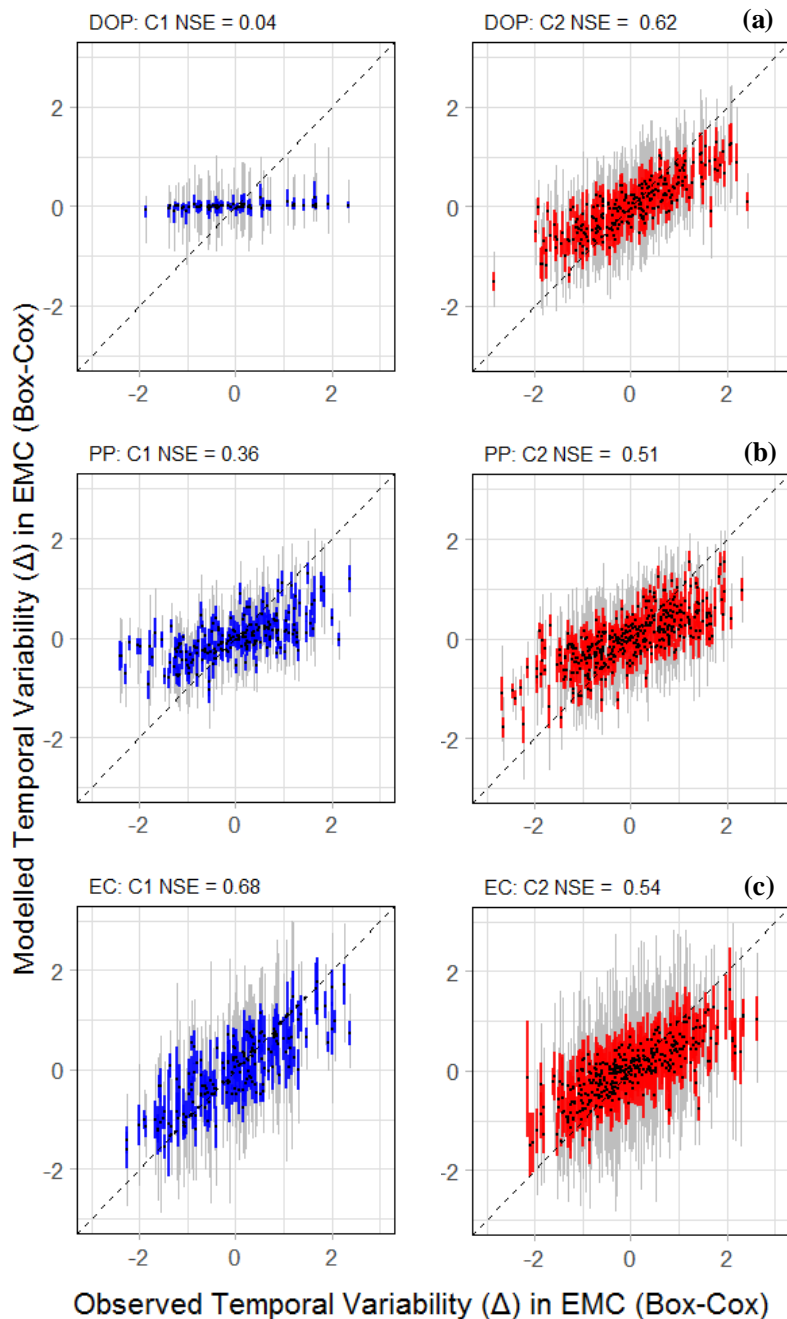

125 **Figure S10: Performance of the BMA models of the temporal variability of nine constituents across 32 sites, represented by prediction intervals from BMA and observed Box-Cox EMC across two clusters of sites for: (a) DOP; (b) PP and (c) EC. The NSE values are calculated based on predictions within group- (cluster) level. Note: black dots are the prediction median; grey vertical lines are the 95% CI and coloured vertical lines indicates 50% CI: blue - Cluster and red - Cluster two. The dashed black lines is the 1:1 relationship.**

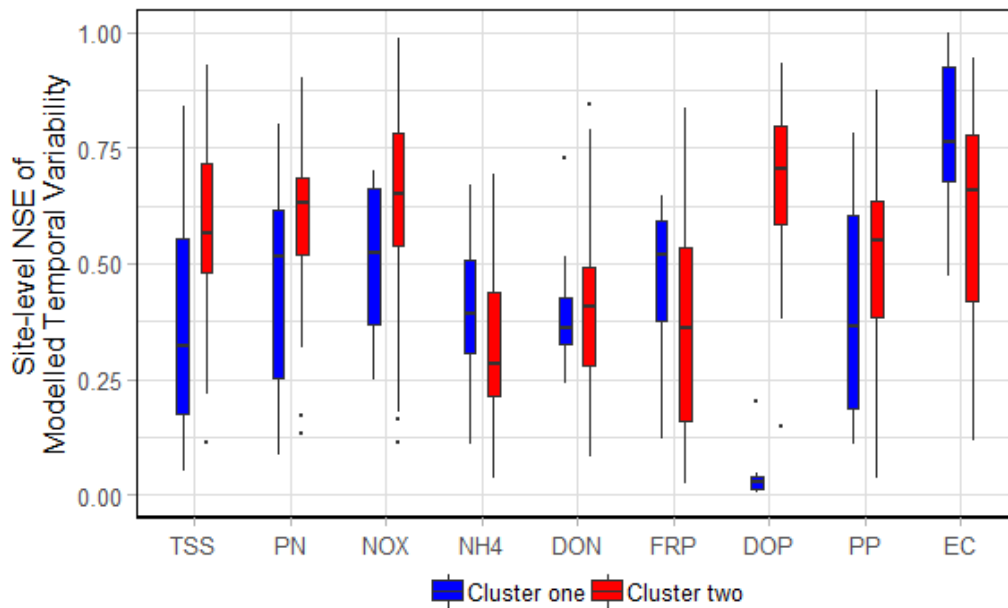

130 **Figure S11: Distribution of site-level NSE for modelled the temporal variability of two clusters of sites. The interpretation of boxplot is the same as Fig. 7. NSE values were calculated based on site-level predictions of event median EMC; blue is Cluster 1 (“wet”); and red is Cluster 2 (“dry”) (i.e., each boxplot is comprised of respective number of sites in each cluster, one for each catchment).**

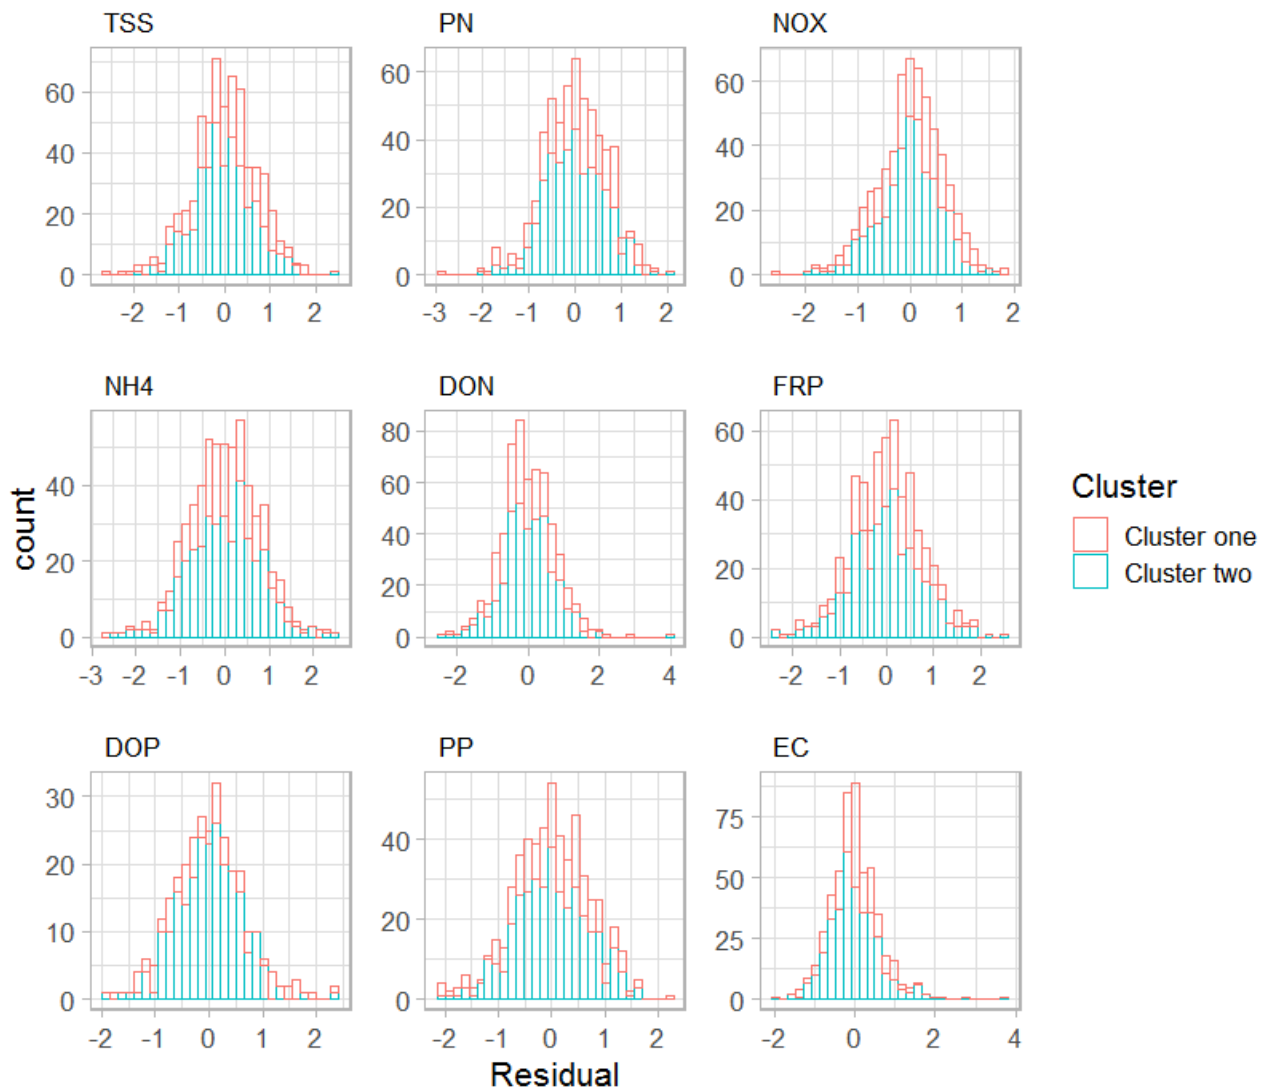

135

Figure S12: Histograms showing distribution of residuals of nine constituents from BMA predictions. Red – Cluster one; Blue – Cluster two.

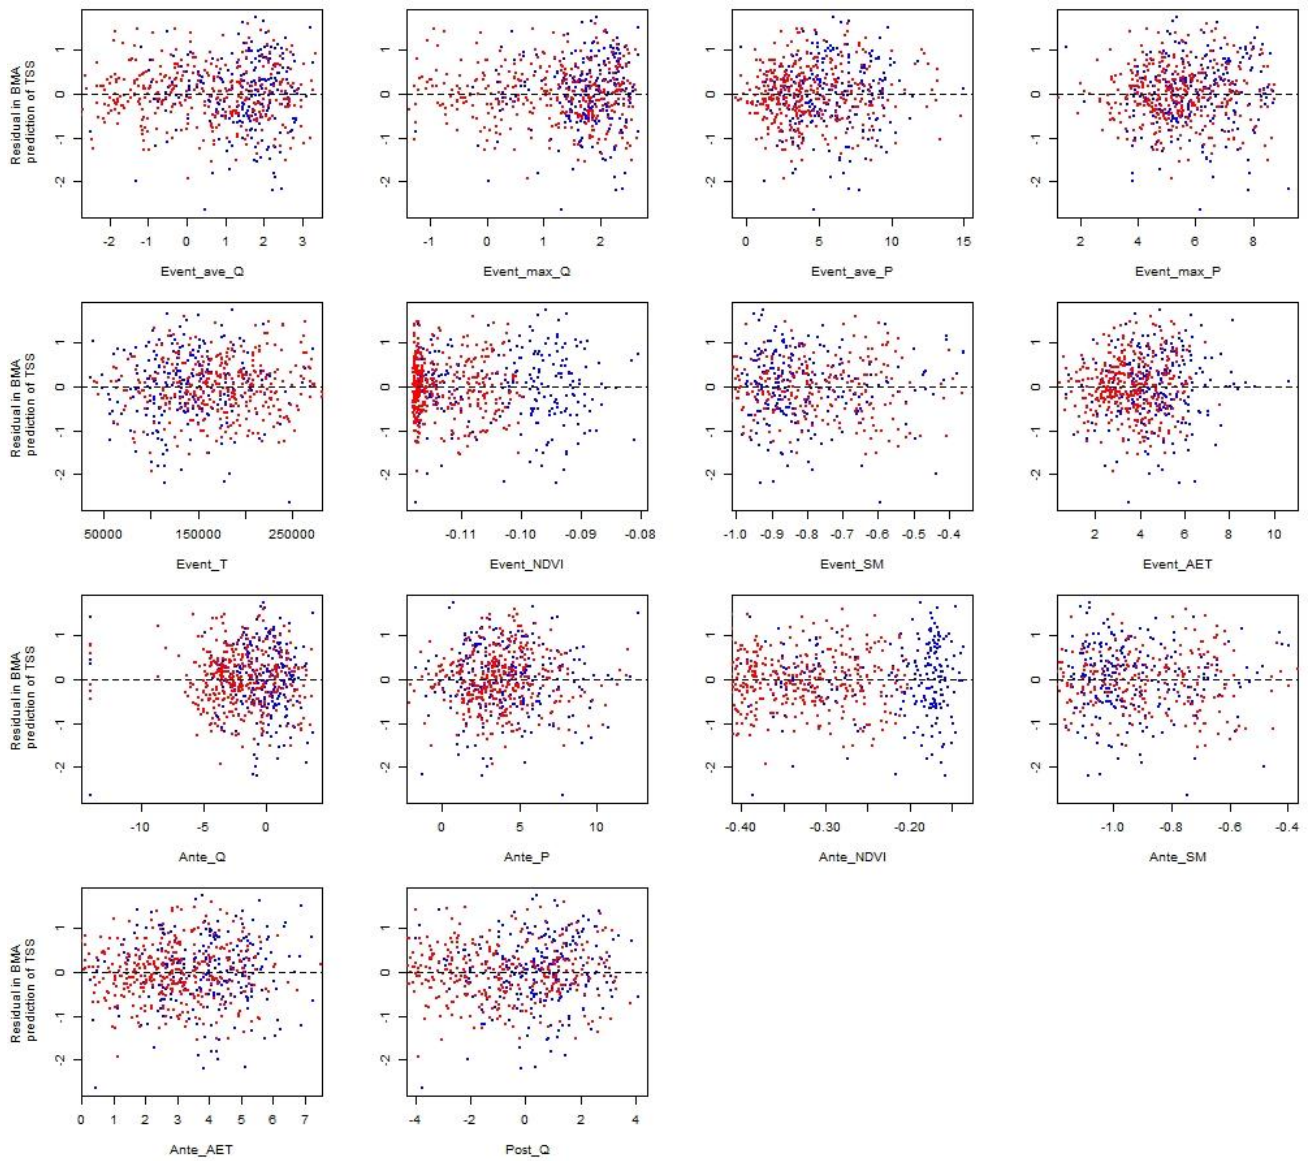

140

**Figure S13: Relationship between residual in median of BMA prediction of TSS and 14 candidate covariates in BMA. Note, difference colours indicate two clusters: Red – Cluster one; Blue – Cluster two.**

145



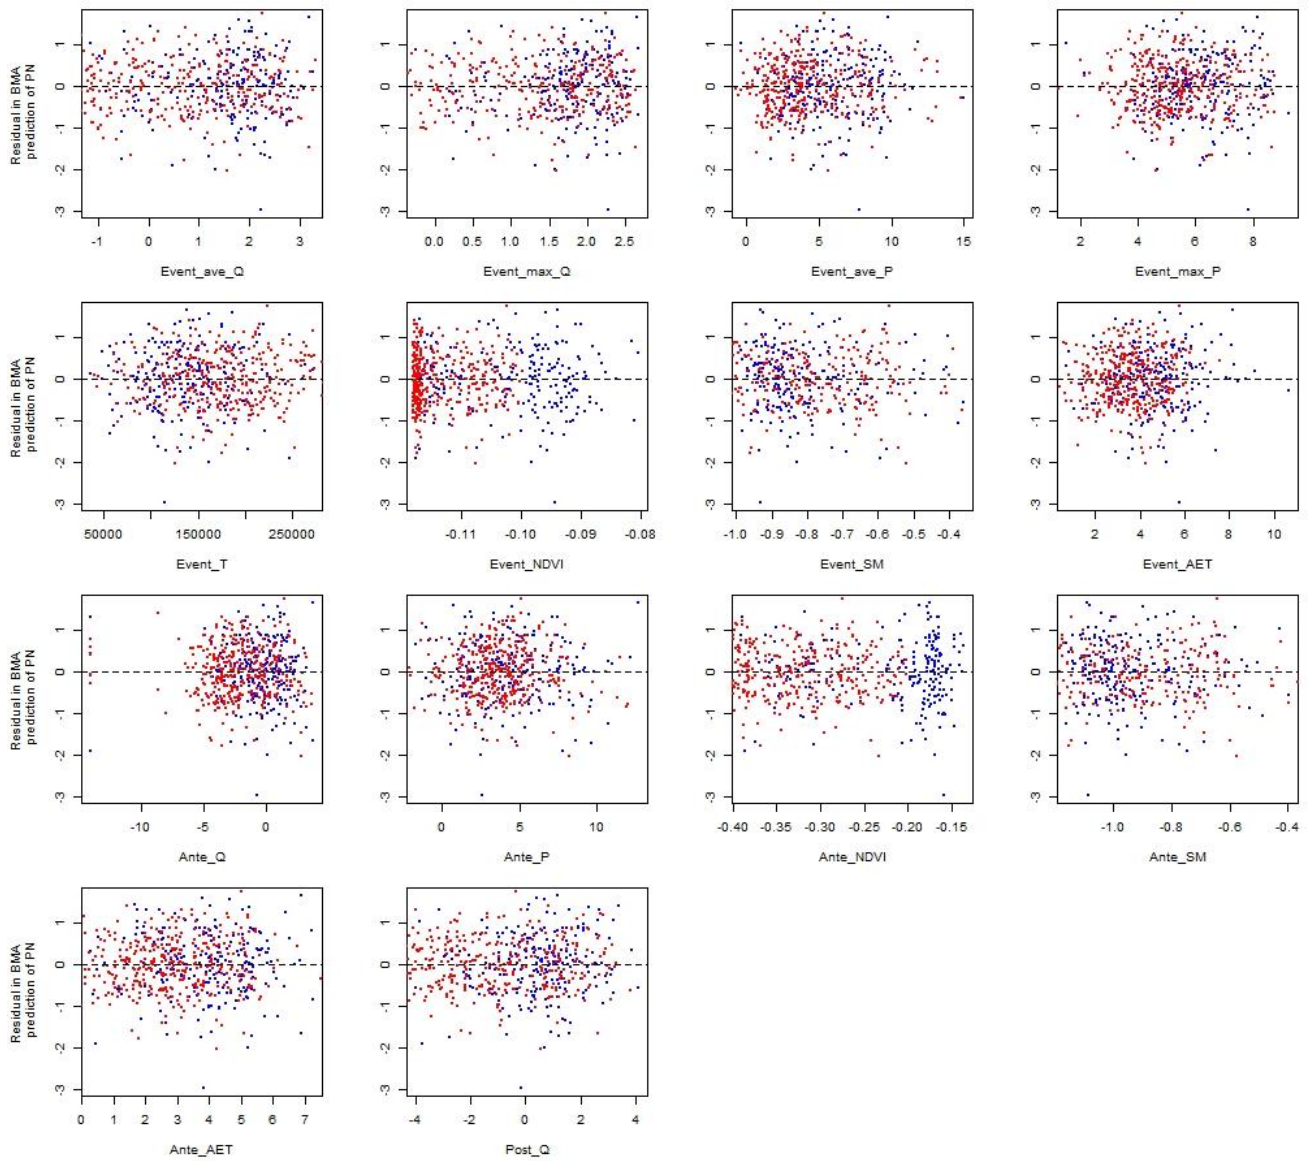

**Figure S14: Relationship between residual in median of BMA prediction of PN and 14 candidate covariates in BMA. Note, difference colours indicate two clusters: Red – Cluster one; Blue – Cluster two.**

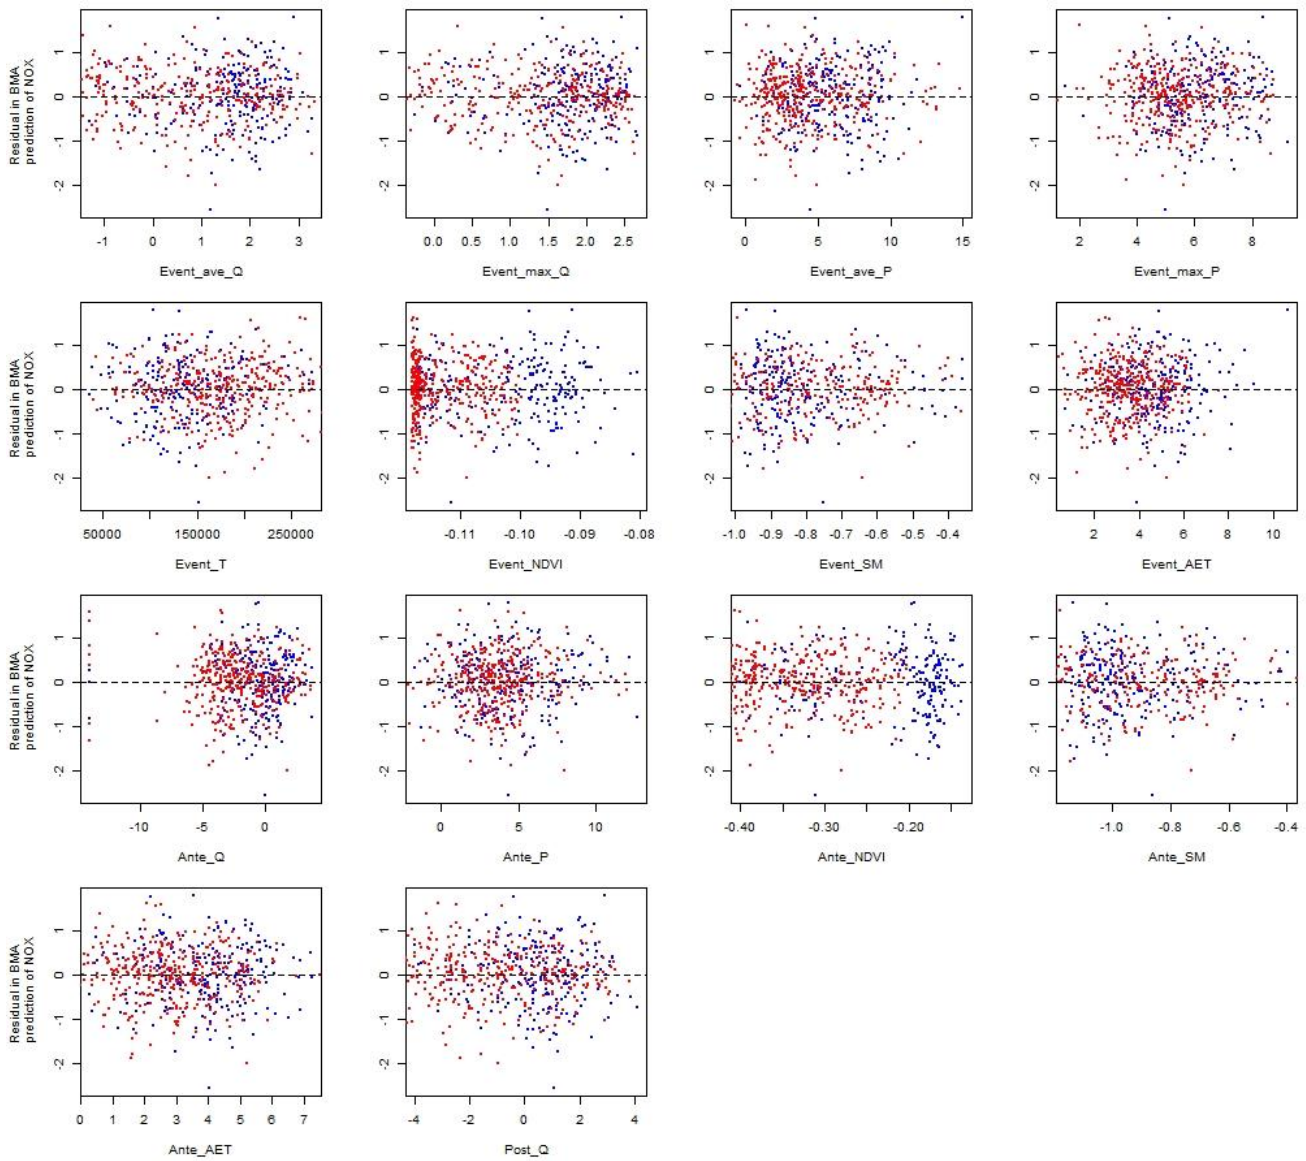

**Figure S15: Relationship between residual in median of BMA prediction of NO<sub>x</sub> and 14 candidate covariates in BMA. Note, difference colours indicate two clusters: Red – Cluster one; Blue – Cluster two.**

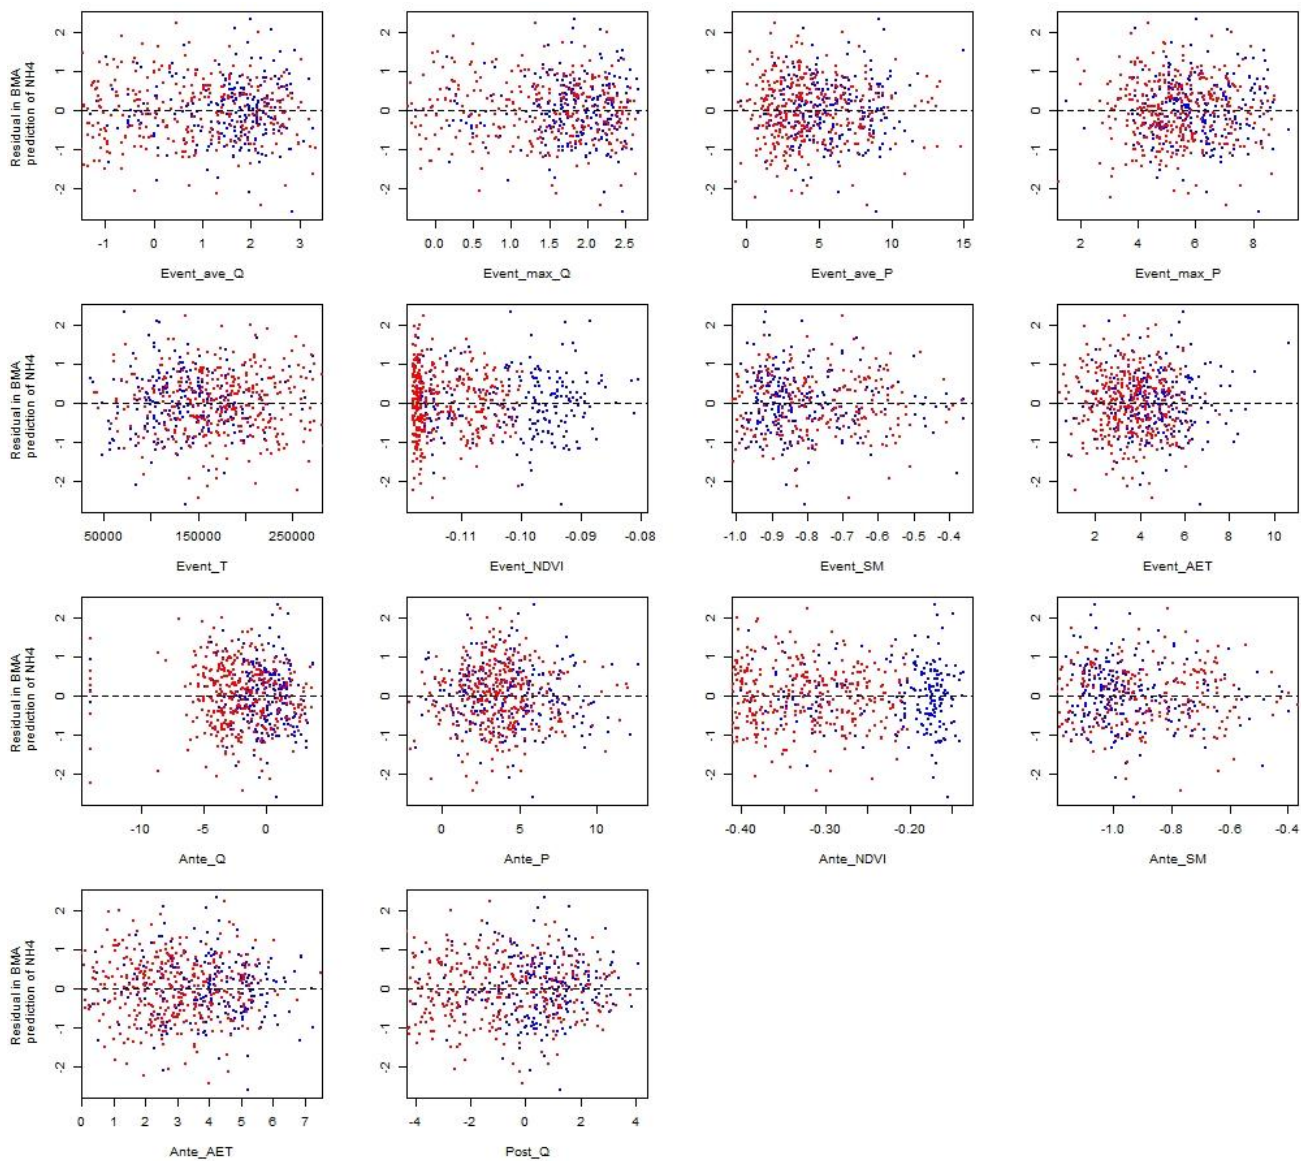

**Figure S16: Relationship between residual in median of BMA prediction of NH<sub>4</sub> and 14 candidate covariates in BMA. Note, difference colours indicate two clusters: Red – Cluster one; Blue – Cluster two.**

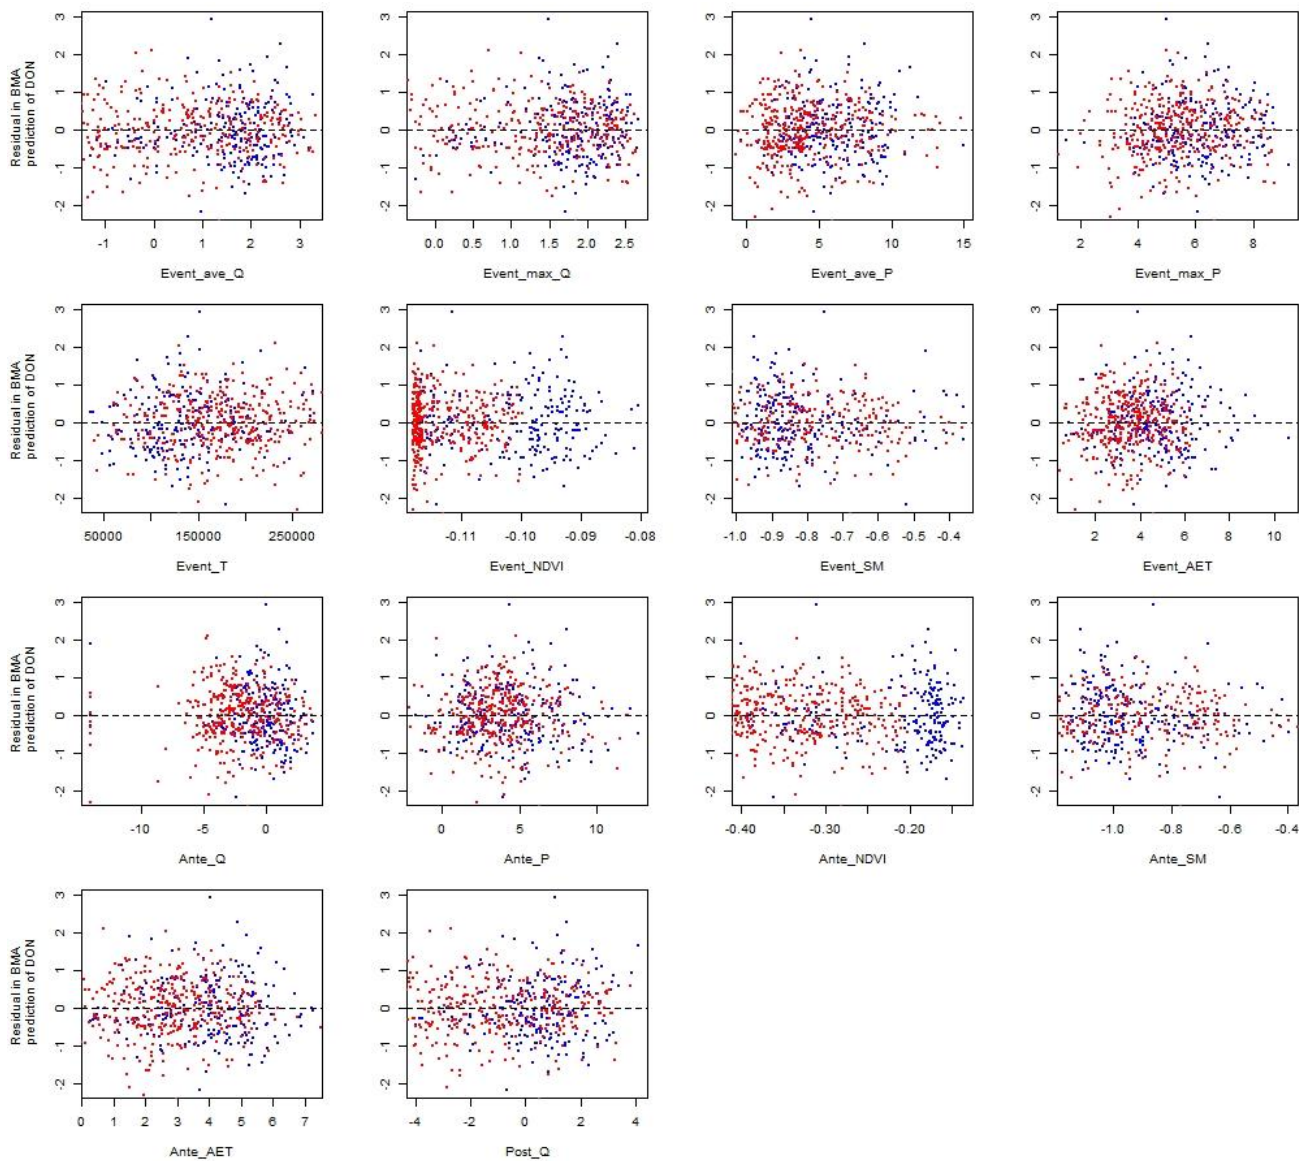

165 **Figure S17: Relationship between residual in median of BMA prediction of DON and 14 candidate covariates in BMA. Note, difference colours indicate two clusters: Red – Cluster one; Blue – Cluster two.**

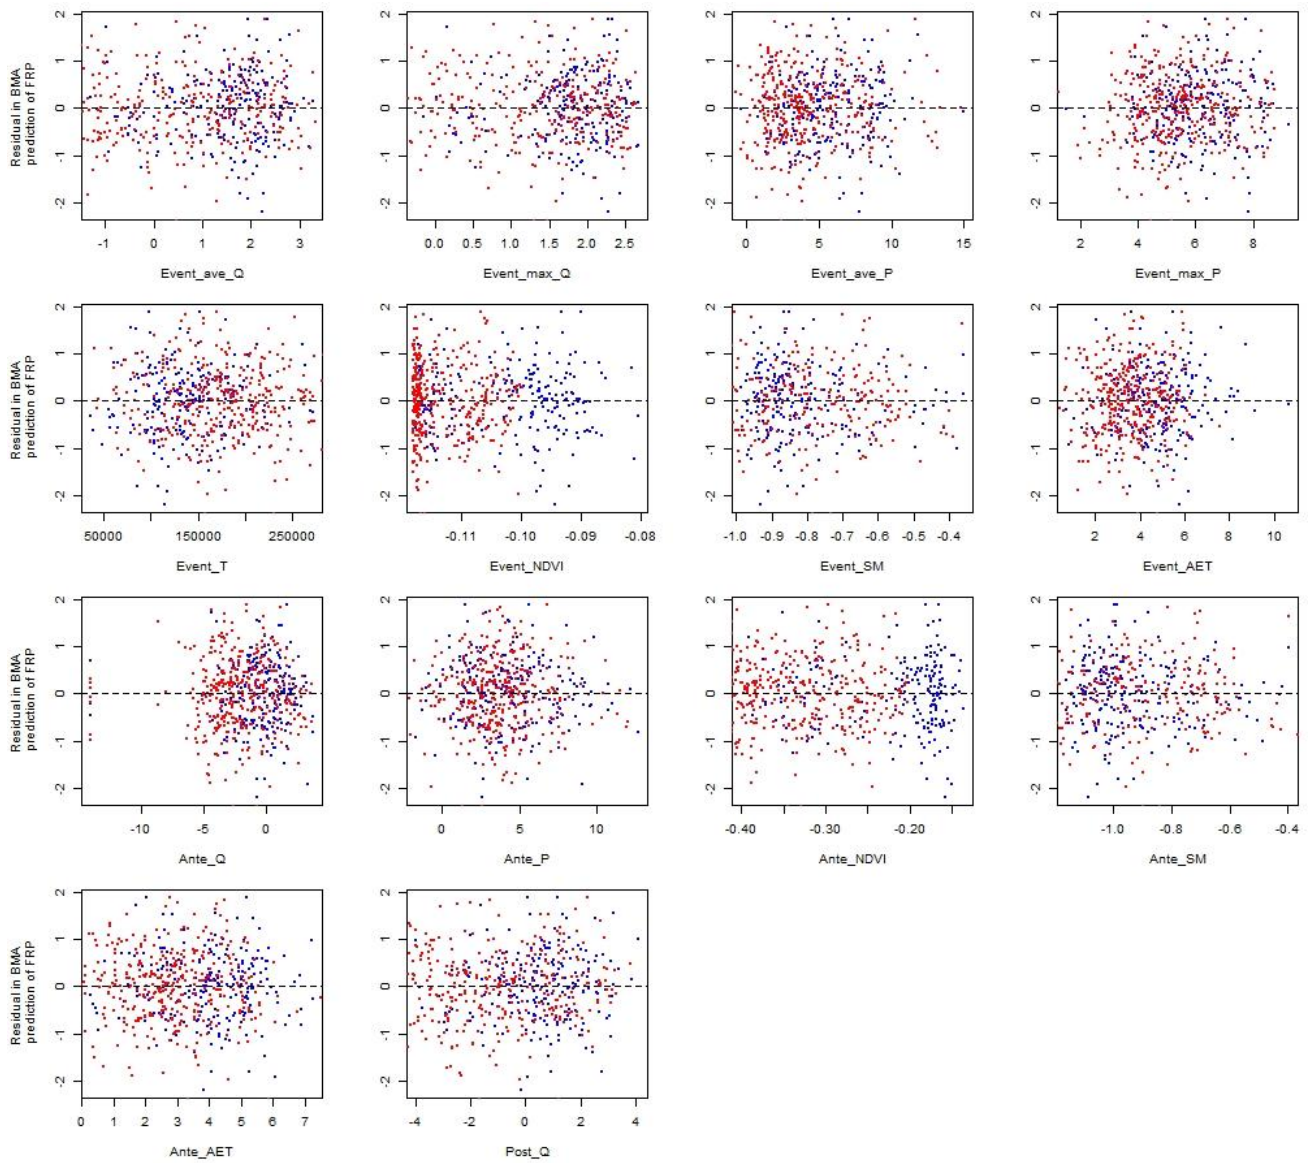

170 **Figure S18: Relationship between residual in median of BMA prediction of FRP and 14 candidate covariates in BMA. Note, difference colours indicate two clusters: Red – Cluster one; Blue – Cluster two.**

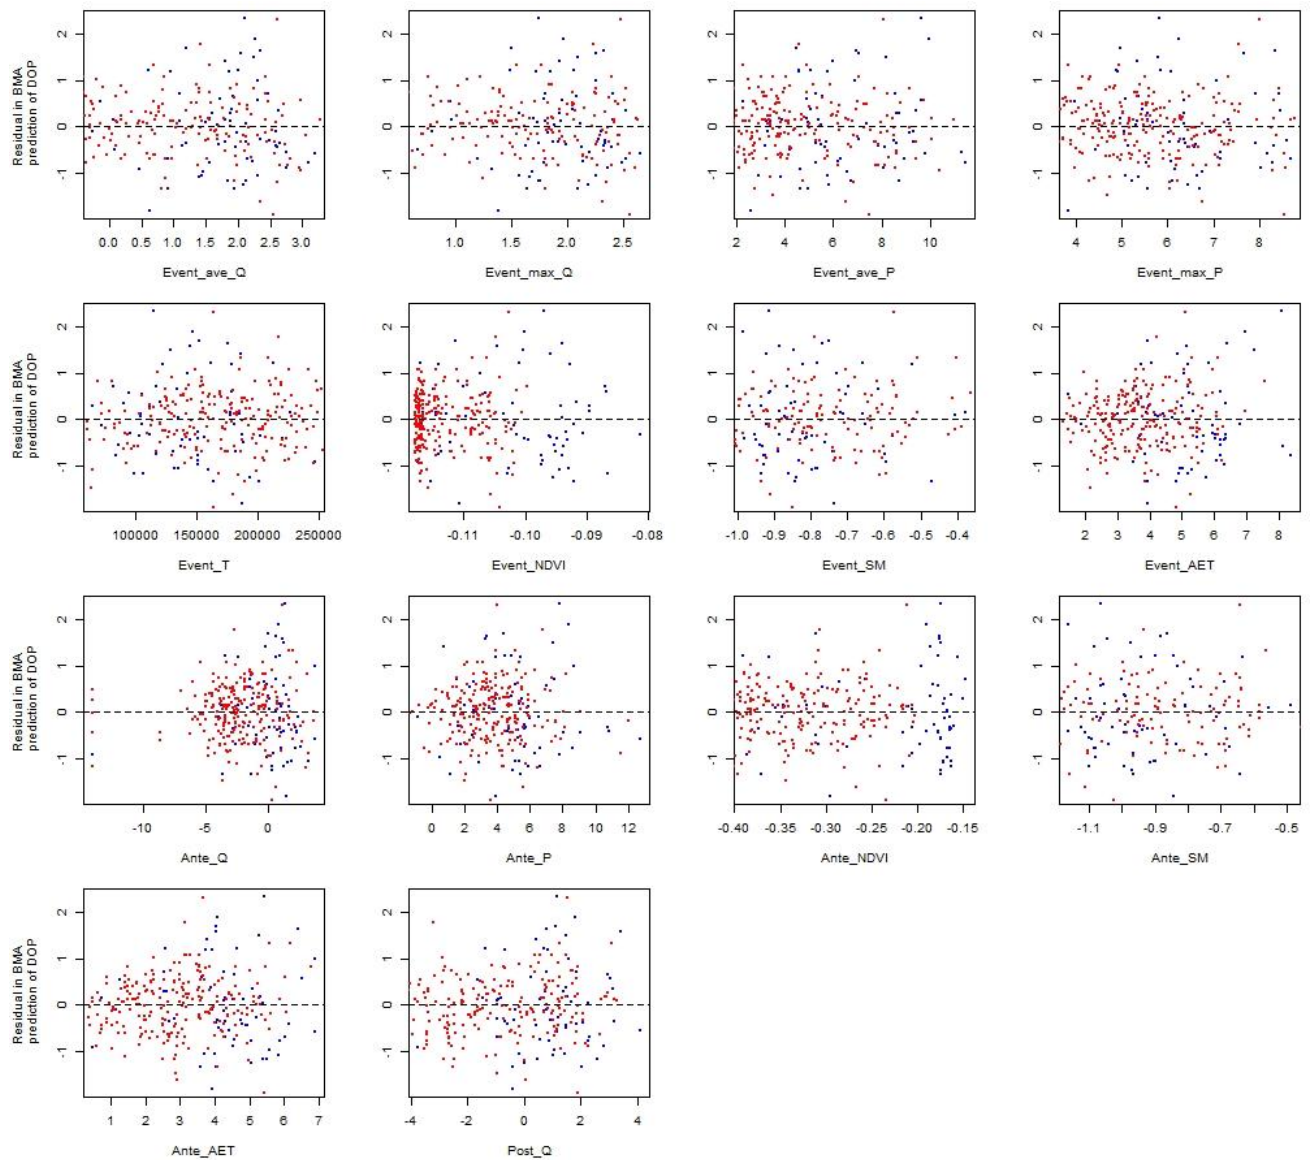

**Figure S19: Relationship between residual in median of BMA prediction of DOP and 14 candidate covariates in BMA. Note, difference colours indicate two clusters: Red – Cluster one; Blue – Cluster two.**

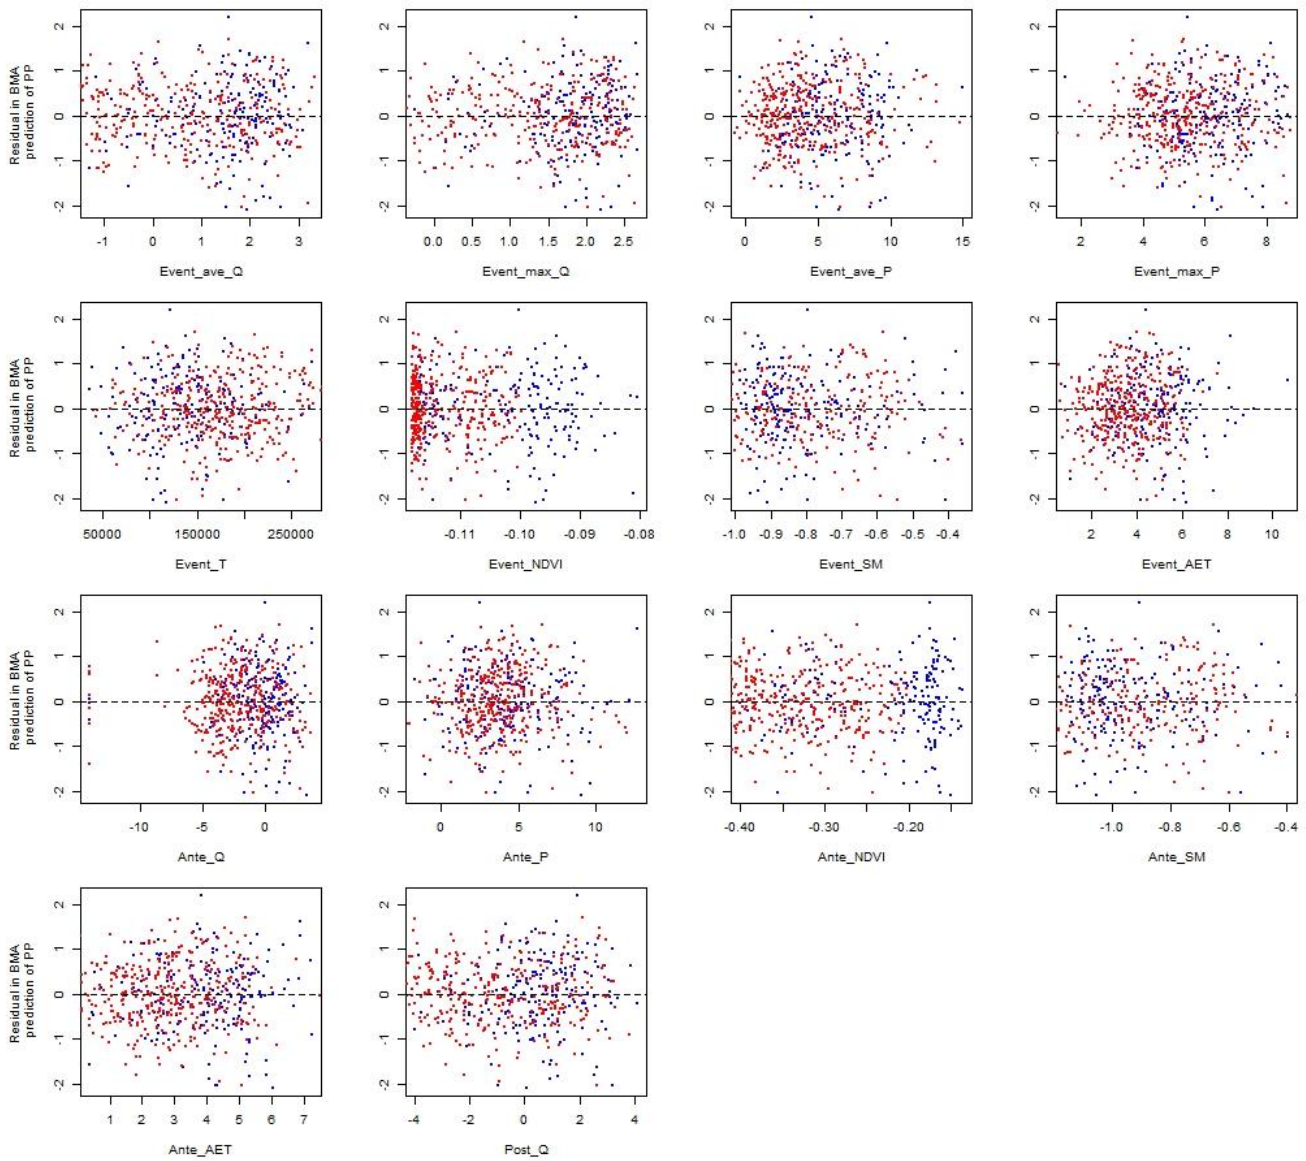

180

**Figure S20: Relationship between residual in median of BMA prediction of PP and 14 candidate covariates in BMA. Note, difference colours indicate two clusters: Red – Cluster one; Blue – Cluster two.**

185

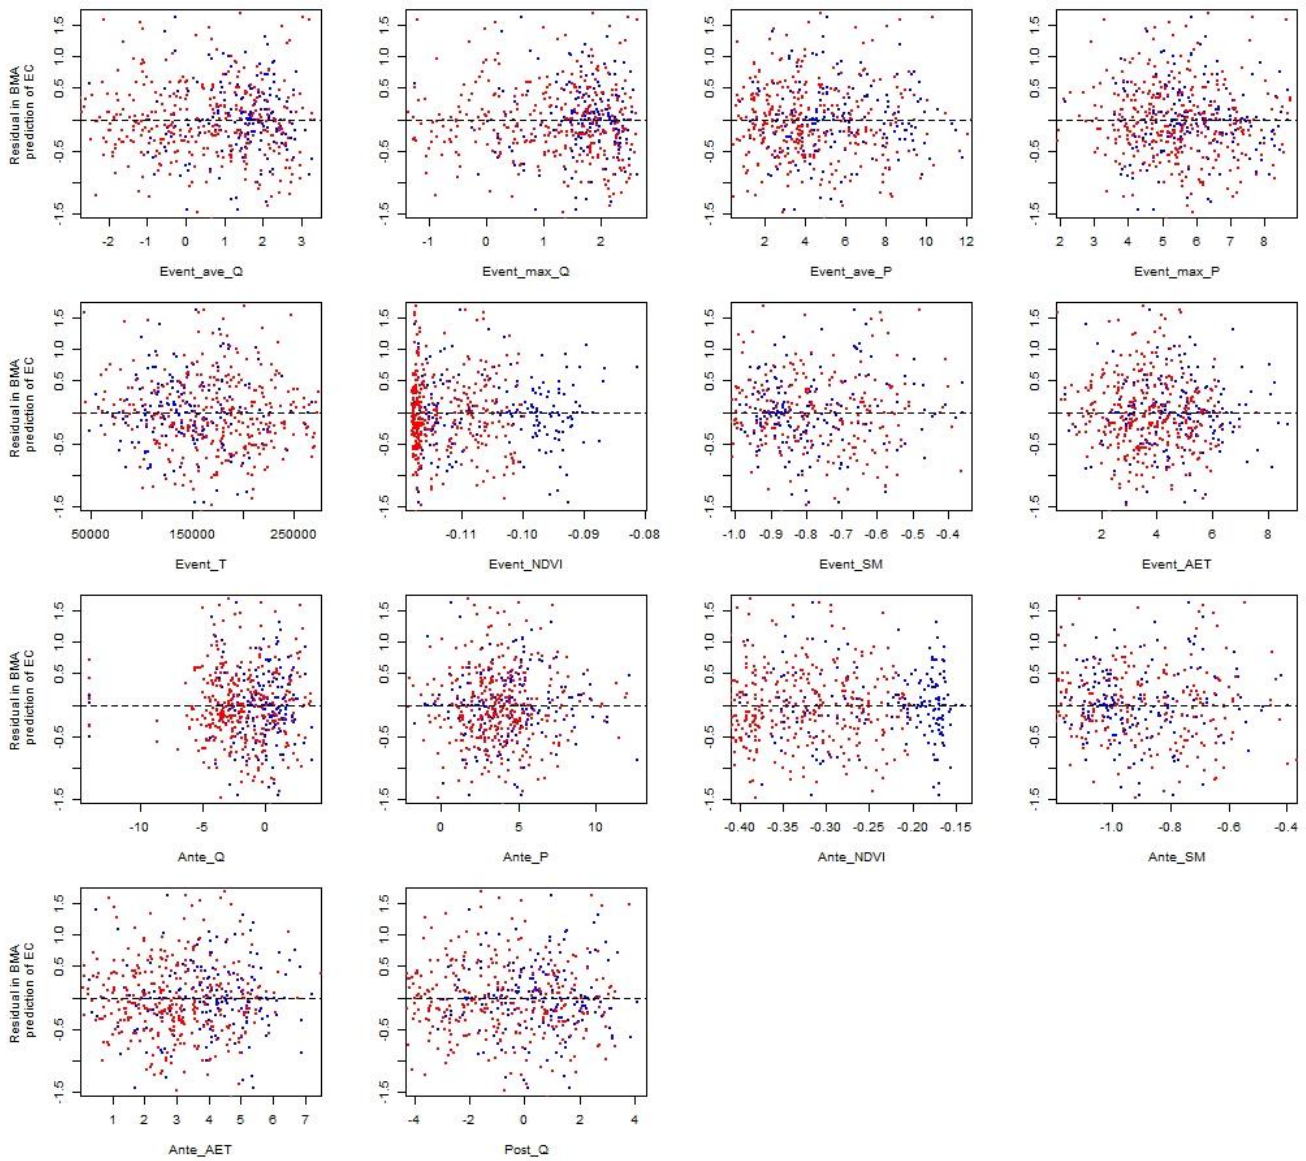

**Figure S21: Relationship between residual in median of BMA prediction of EC and 14 candidate covariates in BMA. Note, difference colours indicate two clusters: Red – Cluster one; Blue – Cluster two.**



**Table S1. Description of 32 sites in the GBR catchments**

| <b>NRM</b>        | <b>Site ID</b> | <b>River and site name</b>                                | <b>Latitude/°</b> | <b>Longitude/°</b> | <b>Catchment area / km<sup>2</sup></b> |
|-------------------|----------------|-----------------------------------------------------------|-------------------|--------------------|----------------------------------------|
| Cape York         | 105107A        | Normanby River at Kalpowar Crossing                       | -14.9185          | 144.2100           | 12934                                  |
| Wet tropics       | 110001D        | Barron River at Myola                                     | -16.7998          | 145.6121           | 1945                                   |
| Wet tropics       | 110002A        | Barron River at Mareeba                                   | -17.0022          | 145.4293           | 836                                    |
| Wet tropics       | 110003A        | Barron River at Picnic Crossing                           | -17.2591          | 145.5386           | 228                                    |
| Wet tropics       | 1110056        | Mulgrave River at Deeral                                  | -17.2075          | 145.9264           | 785                                    |
| Wet tropics       | 1111019        | Russell River at East Russell                             | -17.2672          | 145.9544           | 524                                    |
| Wet tropics       | 1120049        | North Johnstone River at Old Bruce Hwy<br>Bridge (Goondi) | -17.5059          | 145.9920           | 959                                    |
| Wet tropics       | 112004A        | North Johnstone River at Tung Oil                         | -17.5456          | 145.9325           | 925                                    |
| Wet tropics       | 112101B        | South Johnstone River at Upstream<br>Central Mill         | -17.6106          | 145.9789           | 400                                    |
| Wet tropics       | 113006A        | Tully River at Euramo                                     | -17.9936          | 145.9411           | 1450                                   |
| Wet tropics       | 113015A        | Tully River at Tully Gorge National Park                  | -17.7727          | 145.6507           | 482                                    |
| Wet tropics       | 116001F        | Herbert River at Ingham                                   | -18.6328          | 146.1427           | 8581                                   |
| Burdekin          | 119101A        | Barratta Creek at Northcote                               | -19.6923          | 147.1688           | 753                                    |
| Burdekin          | 120001A        | Burdekin River at Home Hill                               | -19.6436          | 147.3958           | 129939                                 |
| Burdekin          | 120002C        | Burdekin River at Sellheim                                | -20.0078          | 146.4369           | 36290                                  |
| Burdekin          | 120301B        | Belyando River at Gregory Development<br>Rd.              | -21.5423          | 146.8656           | 35410                                  |
| Burdekin          | 120302B        | Cape River at Taemas                                      | -20.9996          | 146.4271           | 16070                                  |
| Burdekin          | 120310A        | Suttor River at Bowen Developmental<br>Road               | -21.5375          | 147.0424           | 10760                                  |
| Mackay Whitsunday | 124001B        | O'Connell River at Stafford's Crossing                    | -20.6526          | 148.5730           | 342                                    |
| Mackay Whitsunday | 1240062        | O'Connell River at Caravan Park                           | -20.5664          | 148.6117           | 825                                    |
| Mackay Whitsunday | 125013A        | Pioneer River at Dumbleton Pump<br>Station                | -21.1441          | 149.0753           | 1485                                   |
| Mackay Whitsunday | 126001A        | Sandy Creek at Homebush                                   | -21.2831          | 149.0228           | 326                                    |
| Fitzroy           | 1300000        | Fitzroy River at Rockhampton                              | -23.3175          | 150.4819           | 139159                                 |
| Fitzroy           | 130206A        | Theresa Creek at Gregory Highway                          | -23.4292          | 148.1514           | 8485                                   |
| Fitzroy           | 130302A        | Dawson River at Taroom                                    | -25.6376          | 149.7901           | 15850                                  |
| Fitzroy           | 130504B        | Comet River at Comet Weir                                 | -23.6125          | 148.5514           | 16460                                  |
| Burnett Mary      | 136002D        | Burnett River at Mt Lawless                               | -25.5447          | 151.6549           | 29360                                  |
| Burnett Mary      | 136004A        | Jones Weir HW                                             | -25.5948          | 151.2964           | 21700                                  |
| Burnett Mary      | 136014A        | Burnett River at Ben Anderson Barrage<br>Head Water       | -24.8896          | 152.2922           | 32891                                  |

|              |         |                                  |          |          |       |
|--------------|---------|----------------------------------|----------|----------|-------|
| Burnett Mary | 136094A | Burnett River at Jones Weir (TW) | -25.5948 | 151.2974 | 21700 |
| Burnett Mary | 136106A | Burnett River at Eidsvold        | -25.4023 | 151.1033 | 7117  |
| Burnett Mary | 138014A | Mary River at Home Park          | -25.7683 | 152.5274 | 6845  |

**Table S2. Parameters for running the Hydrun toolbox**

| Filter coefficient | Pass for baseflow separation | Peak discharge threshold | Return ratio | Smooth coefficient | Minimum duration |
|--------------------|------------------------------|--------------------------|--------------|--------------------|------------------|
| 0.975              | 3                            | 100                      | 0.01         | 6                  | 24               |

200

**Table S3. Average number of samples per event for each constituent**

| TSS | PN | NO <sub>x</sub> | NH <sub>4</sub> | DON | FRP | DOP | PP | EC |
|-----|----|-----------------|-----------------|-----|-----|-----|----|----|
| 15  | 14 | 14              | 14              | 14  | 15  | 12  | 14 | 16 |

**Table S4. Number of EMCs for each constituent**

| Cluster              | TSS | PN  | NO <sub>x</sub> | NH <sub>4</sub> | DON | FRP | DOP | PP  | EC  |
|----------------------|-----|-----|-----------------|-----------------|-----|-----|-----|-----|-----|
| One                  | 225 | 207 | 218             | 217             | 215 | 210 | 66  | 186 | 174 |
| Two                  | 381 | 370 | 372             | 370             | 373 | 372 | 231 | 366 | 354 |
| % of event monitored | 43  | 41  | 42              | 42              | 42  | 41  | 21  | 39  | 37  |

205

**Table S5. Posterior inclusion probability of individual predictor derived from BMA on two clusters of sites.**

| Predictor   | TSS         |             | PN          |             | NO <sub>x</sub> |             | NH <sub>4</sub> |             | DON         |             | FRP         |             | DOP         |             | PP          |             | EC          |             |
|-------------|-------------|-------------|-------------|-------------|-----------------|-------------|-----------------|-------------|-------------|-------------|-------------|-------------|-------------|-------------|-------------|-------------|-------------|-------------|
|             | Cluster one | Cluster two | Cluster one | Cluster two | Cluster one     | Cluster two | Cluster one     | Cluster two | Cluster one | Cluster two | Cluster one | Cluster two | Cluster one | Cluster two | Cluster one | Cluster two | Cluster one | Cluster two |
| Event_ave_Q | 0.93        | 0.47        | 0.87        | 0.49        | 0.97            | 0.56        | 0.21            | 0.68        | 0.47        | 0.47        | 0.33        | 0.38        | 0.46        | 0.58        | 0.92        | 0.85        | 1.00        | 0.86        |
| Event_max_Q | 0.73        | 1.00        | 0.76        | 1.00        | 0.33            | 0.58        | 0.14            | 0.79        | 0.79        | 0.60        | 0.94        | 0.43        | 0.46        | 0.85        | 0.66        | 0.99        | 1.00        | 0.63        |
| Event_ave_P | 0.92        | 0.92        | 0.98        | 0.92        | 0.32            | 0.07        | 0.25            | 0.51        | 0.52        | 0.16        | 0.79        | 0.96        | 0.45        | 0.24        | 0.86        | 0.82        | 0.67        | 0.90        |
| Event_max_P | 0.24        | 0.48        | 0.24        | 0.29        | 0.47            | 0.01        | 0.10            | 0.13        | 0.31        | 0.17        | 0.68        | 0.44        | 0.41        | 0.27        | 0.67        | 0.15        | 1.00        | 0.96        |
| Event_T     | 0.07        | 0.27        | 0.50        | 0.21        | 0.19            | 0.98        | 0.16            | 0.58        | 0.88        | 0.26        | 0.86        | 0.90        | 0.48        | 0.78        | 0.53        | 0.61        | 1.00        | 0.64        |
| Event_ND_VI | 0.03        | 0.27        | 0.09        | 0.89        | 0.77            | 0.55        | 0.68            | 0.62        | 0.35        | 0.34        | 0.38        | 0.49        | 0.46        | 0.97        | 0.39        | 0.52        | 0.75        | 0.79        |
| Event_SM    | 0.54        | 0.21        | 0.83        | 0.58        | 0.99            | 0.38        | 0.96            | 0.21        | 0.64        | 0.19        | 0.59        | 0.48        | 0.47        | 0.66        | 0.40        | 0.35        | 0.33        | 0.60        |
| Event_AE_T  | 0.13        | 0.07        | 0.12        | 0.90        | 0.61            | 1.00        | 0.68            | 0.57        | 0.43        | 0.86        | 0.57        | 0.38        | 0.51        | 0.87        | 0.17        | 0.81        | 0.33        | 0.10        |

|            |      |             |      |             |             |             |             |             |             |             |             |             |      |             |      |             |             |             |
|------------|------|-------------|------|-------------|-------------|-------------|-------------|-------------|-------------|-------------|-------------|-------------|------|-------------|------|-------------|-------------|-------------|
| Ante_Q     | 0.23 | 0.18        | 0.76 | 0.76        | 0.15        | <i>0.98</i> | 0.30        | 0.37        | 0.56        | 0.25        | 0.36        | <i>0.86</i> | 0.47 | 0.17        | 0.25 | 0.12        | 0.33        | 0.59        |
| Ante_P     | 0.20 | 0.05        | 0.22 | 0.06        | 0.16        | 0.03        | 0.25        | 0.70        | 0.22        | 0.75        | 0.25        | <i>0.88</i> | 0.44 | 0.98        | 0.13 | 0.06        | <i>0.81</i> | <i>0.91</i> |
| Ante_ND_VI | 0.23 | <i>1.00</i> | 0.56 | <i>1.00</i> | <i>0.86</i> | <i>1.00</i> | <i>0.99</i> | <i>0.89</i> | 0.47        | <i>1.00</i> | <i>0.97</i> | <i>0.93</i> | 0.67 | <i>1.00</i> | 0.44 | <i>1.00</i> | 0.33        | 0.61        |
| Ante_SM    | 0.13 | 0.74        | 0.38 | <i>0.90</i> | 0.79        | <i>1.00</i> | 0.63        | <i>0.96</i> | <i>0.83</i> | <i>0.99</i> | <i>0.90</i> | <i>0.95</i> | 0.50 | <i>0.89</i> | 0.19 | 0.59        | <i>1.00</i> | 0.70        |
| Ante_AE_T  | 0.09 | <i>0.81</i> | 0.27 | 0.31        | 0.31        | 0.60        | 0.20        | 0.72        | 0.33        | 0.10        | 0.42        | 0.48        | 0.42 | 0.30        | 0.14 | 0.61        | 0.33        | <i>1.00</i> |
| Post_Q     | 0.41 | 0.07        | 0.21 | 0.27        | 0.18        | <i>1.00</i> | 0.16        | 0.77        | 0.66        | <i>0.80</i> | 0.17        | <i>0.81</i> | 0.42 | 0.10        | 0.32 | 0.37        | <i>1.00</i> | 0.63        |

Note: Posterior inclusion probability  $\geq 0.8$  in italic.

**Table S6. Comparison between BMA performance using rainfall/runoff predictors only and all candidate predictors (full models).**

| Constituent     | NSE for Cluster 1 (“wet”) |            |                 | NSE for Cluster 2 (“dry”) |            |                 |
|-----------------|---------------------------|------------|-----------------|---------------------------|------------|-----------------|
|                 | Rainfall, runoff only     | Full model | % change in NSE | Rainfall, runoff only     | Full model | % change in NSE |
| TSS             | 0.32                      | 0.35       | 11              | 0.42                      | 0.58       | 38              |
| PN              | 0.32                      | 0.40       | 24              | 0.38                      | 0.59       | 56              |
| NO <sub>x</sub> | 0.23                      | 0.49       | 113             | 0.32                      | 0.64       | 101             |
| NH <sub>4</sub> | 0.00                      | 0.39       | /               | 0.18                      | 0.34       | 88              |
| DON             | 0.20                      | 0.37       | 84              | 0.20                      | 0.43       | 117             |
| FRP             | 0.27                      | 0.45       | 68              | 0.26                      | 0.40       | 56              |
| DOP             | 0.00                      | 0.04       | /               | 0.22                      | 0.62       | 181             |
| PP              | 0.29                      | 0.36       | 24              | 0.34                      | 0.51       | 51              |
| EC              | 0.41                      | 0.68       | 66              | 0.39                      | 0.54       | 39              |

210 **Table S7. Performance statistics for nine constituents for the modelled and observed temporal variability, according to Moriasi et al. (2015).**

| Constituent     | Cluster one  | Cluster two  |
|-----------------|--------------|--------------|
| TSS             | Indicative   | Satisfactory |
| PN              | Satisfactory | Satisfactory |
| NO <sub>x</sub> | Satisfactory | Good         |
| NH <sub>4</sub> | Satisfactory | Indicative   |
| DON             | Satisfactory | Satisfactory |
| FRP             | Satisfactory | Satisfactory |
| DOP             | Indicative   | Good         |
| PP              | Satisfactory | Satisfactory |
| EC              | Satisfactory | Satisfactory |
